# Supplementary material for: Molecular Pathogenesis of Glioblastoma in Adults and Future Perspectives: A Systematic Review
Source: Int J Mol Sci. 2022 Feb 26;23(5):2607. doi: 10.3390/ijms23052607 (PMC8910150; doi:10.3390/ijms23052607)
Supplement: Supplementary file 1 [file ijms-23-02607-s001.zip › Full Search Results Tables.pdf]

**Table S1.** Tier-1 search results for signaling pathways.

| Article Title                                                                                                                                                 | Authors     | Journal                                              | PMID     | Year | Outcome                                                                                                                                                                                                                                                                                                  |
|---------------------------------------------------------------------------------------------------------------------------------------------------------------|-------------|------------------------------------------------------|----------|------|----------------------------------------------------------------------------------------------------------------------------------------------------------------------------------------------------------------------------------------------------------------------------------------------------------|
| HMGA1 stimulates MYH9-dependent ubiquitination of GSK-3 $\beta$ via PI3K/Akt/c-Jun signaling to promote malignant progression and chemoresistance in gliomas. | Que et al.  | Cell death and disease                               | 34887392 | 2021 | HMGA promotes MYH-9 expression which then potentiates tumourgenic effect including migration through GSK-3 $\beta$ with stimulation likely through $\beta$ -catenin.                                                                                                                                     |
| The Circ_0001367/miR-545-3p/LUZP1 Axis Regulates Cell Proliferation, Migration and Invasion in Glioma Cells                                                   | Dong et al. | Frontiers in Oncology                                | 34869035 | 2021 | Down-regulation of circ_0001367 (circular RNA) and LUZP1 (regulation of actin cytoskeleton) was demonstrated in GBM cells; both act to reduce invasion, migration and proliferation.                                                                                                                     |
| SPAG5 Is Involved in Human Gliomagenesis Through the Regulation of Cell Proliferation and Apoptosis                                                           | Wang et al. | Frontiers in Oncology                                | 34796102 | 2021 | Sperm-associated antigen 5 (SPAG5) oncogene knockdown reduced proliferation and colony formation, additionally it inhibits migration and invasion.                                                                                                                                                       |
| A novel lncRNA ARST represses glioma progression by inhibiting ALDOA-mediated actin cytoskeleton integrity                                                    | Sun et al.  | Journal of experimental and clinical cancer research | 34099027 | 2021 | ARST operates as a tumour suppressor by disrupting interaction between ALDOA and actin cytoskeleton leading to rapid cofilin-dependent loss of F-actin stress fibers inhibiting cell migration and invasion.<br><br>Fructose-bisphosphate aldolase A (ALDOA)<br>ALDOA Related Specific Transcript (ARST) |
| Decreased expression of miR-410-3p correlates with poor prognosis and tumorigenesis in human glioma                                                           | Wang et al. | Cancer Management and Research                       | 31908530 | 2019 | Blockage of miR-410-3p significantly facilitated migration, enhanced expression of MMP9 and vimentin                                                                                                                                                                                                     |

|                                                                                                                                                            |                   |                                                      |          |      |                                                                                                                                                                              |
|------------------------------------------------------------------------------------------------------------------------------------------------------------|-------------------|------------------------------------------------------|----------|------|------------------------------------------------------------------------------------------------------------------------------------------------------------------------------|
| NKAP alters tumor immune microenvironment and promotes glioma growth via Notch1 signaling                                                                  | Gu et al.         | Journal of Experimental and Clinical Cancer Research | 31277684 | 2019 | NKAP knockdown caused less cell migration and inhibited EMT by drastically reducing N-cadherin, Twist1 and Vimentin.                                                         |
| Zeb1 potentiates genome-wide gene transcription with Lef1 to promote glioblastoma cell invasion                                                            | Rosmaninho et al. | EMBO Journal                                         | 29903919 | 2018 | Inhibition of Zeb1 (EMT inducing factor) reduced GBM cell migration mediated by Prex 1 (guanine nucleotide exchange factor).                                                 |
| IDH1 R132H Mutation Enhances Cell Migration by Activating AKT-mTOR Signaling Pathway, but Sensitizes Cells to 5-FU Treatment as NADPH and GSH Are Reduced. | Zhu et al.        | PLoS                                                 | 28052098 | 2017 | IDH1 R132H mutation promotes AKT-mTOR pathway to increase MMP and $\beta$ -Catenin reduce E-cadherin.                                                                        |
| CBX7 negatively regulates migration and invasion in glioma via Wnt/ $\beta$ -catenin pathway inactivation                                                  | Bao et al.        | Onco-target                                          | 28388562 | 2017 | CBX7 (Polycomb-group proteins) overexpression prevents EMT and migration through interaction with Wnt/ $\beta$ -catenin pathway. It reduces expression of MMP and cadherins. |
| RasGRP3 regulates the migration of glioma cells via interaction with Arp3                                                                                  | Lee et al.        | Onco-target                                          | 25682201 | 2015 | RasGRP3 (Ras protein) activity is upregulated in GBM, it interacts with Arp3 (actin-related protein), to promote actin polymerisation and cell migration.                    |
| Overexpression of SCLIP promotes growth and motility in glioblastoma cells                                                                                 | Zhang et al       | Cancer Biology Therapy                               | 25511414 | 2015 | SCLIP (microtubule-destabilizing protein) is detected at high levels in GBMs augments migration. STAT3 is required for maintaining SCLIP stability.                          |
| NOTCH3 is a prognostic factor that promotes glioma cell proliferation, migration and invasion via                                                          | Alqudah et al.    | PLoS One.                                            | 24143218 | 2013 | NOTCH overexpression in GBM increased cell migration.                                                                                                                        |

|                                                                                                                                                  |                    |                          |          |      |                                                                                 |
|--------------------------------------------------------------------------------------------------------------------------------------------------|--------------------|--------------------------|----------|------|---------------------------------------------------------------------------------|
| activation of CCND1 and EGFR                                                                                                                     |                    |                          |          |      |                                                                                 |
| Role of histone lysine methyltransferases SUV39H1 and SETDB1 in gliomagenesis: modulation of cell proliferation, migration, and colony formation | Soyropoulou et al. | Neuro-molecular Medicine | 23943221 | 2013 | Inhibiting H3K9 - Histone methyltransferase leads to reduced GBM cell migration |

**Table S2.** Tier-2 search results for cell survival.

| Article Title                                                                                                                                        | Authors                                       | Journal          | PMID     | Year | Outcome                                                                                                                                                                                                                                                                                                                                             |
|------------------------------------------------------------------------------------------------------------------------------------------------------|-----------------------------------------------|------------------|----------|------|-----------------------------------------------------------------------------------------------------------------------------------------------------------------------------------------------------------------------------------------------------------------------------------------------------------------------------------------------------|
| Investigation of simian virus 40 (SV40) and human JC, BK, MC, KI, and WU polyomaviruses in glioma.                                                   | Limam S, Missaoui N, Bdioui A, et al.         | J Neuro-virol.   | 32124265 | 2020 | Although some polyomaviruses (SV40, JCPyV and MCPyV) were found in GBM sample it did not show they were implicated in gliomagenesis. Detection of these as passenger viruses may allude to their ability to replicate more easily in GBM cells.                                                                                                     |
| Chondroitin sulfate content and decorin expression in glioblastoma are associated with proliferative activity of glioma cells and disease prognosis. | Tsidulko AY, Kazanskaya GM, Volkov AM, et al. | Cell Tissue Res. | 31773303 | 2020 | Chondroitin sulphate (CS) proteoglycans such as decorin was overexpressed in GBM cells, raised content was associated with high cell proliferation. Decorin was negatively correlated with patient survival rates. However, high overall CS content was linked with better survival suggesting variability within CS subtypes.                      |
| $\alpha$ -Ketoglutarate-Activated NF- $\kappa$ B Signaling Promotes Compensatory Glucose Uptake and Brain Tumor Development.                         | Wang X, Liu R, Qu X, et al.                   | Mol Cell.        | 31447391 | 2019 | Glucose is upregulated by GDH-1 phosphorylation at S384 subunit, interaction with IKK occurs due to low glucose level, this in turn produces alpha ketoglutarate which subsequently activates NK-kB signaling. NF-kB signaling then enhances glucose uptake by the tumor. Under dampened glucose levels IDH-1 depletion reduces GBM cell viability. |
| Nuclear Smad6 promotes gliomagenesis by negatively regulating PIAS3-mediated STAT3 inhibition.                                                       | Jiao J, Zhang R, Li Z, et al.                 | Nat Commun.      | 29950561 | 2018 | Cell lines including nuclear Smad6 had quicker cell growth compared with other cell lines. STAT3 was upregulated secondary to Smad6 negative PIAS3 regulation promoting gliomagenesis.                                                                                                                                                              |

|                                                                                                                                             |                                                        |                             |          |      |                                                                                                                                                                                                                                                                    |
|---------------------------------------------------------------------------------------------------------------------------------------------|--------------------------------------------------------|-----------------------------|----------|------|--------------------------------------------------------------------------------------------------------------------------------------------------------------------------------------------------------------------------------------------------------------------|
| Germline polymorphisms in myeloid-associated genes are not associated with survival in glioma patients.                                     | Jacobs DI, Liu Y, Gabrusiewicz K, et al.               | J Neu-rooncol.              | 28965162 | 2018 | GBM microenvironment includes myeloid cell lineage which change phenotype to support tumour progression. Single nucleotide polymorphisms (SNPs) were tagged in 91 myeloid associated genes in GBM patients. No correlation was found in between SNPs and survival. |
| High-dose Neural Stem Cell Radiation May Not Improve Survival in Glioblastoma.                                                              | Achari R, Arunsinh M, Badgami RK, et al.               | Clin Oncol (R Coll Radiol). | 28188088 | 2017 | High dose radiation to Neural Stem cell (NSC), which is usually avoided to maintain plasticity and neurocognition, did not improve survival. Note patients continued standard therapy. Ipsilateral irradiation actually reduced survival rates.                    |
| The transcription factor PPAR $\alpha$ is overexpressed and is associated with a favourable prognosis in IDH-wildtype primary glioblastoma. | Haynes HR, White P, Hares KM, et al.                   | Histopathology.             | 27926792 | 2017 | PPAR $\alpha$ is overexpressed in GBM, it did not correlate with prognosis, however it can act as a positive prognostic indicator as examined via TCG.                                                                                                             |
| NF-YC in glioma cell proliferation and tumor growth and its role as an independent predictor of patient survival.                           | Cui H, Zhang M, Wang Y, Wang Y.                        | Neurosci Lett.              | 27495011 | 2016 | Nuclear factor-Y (NF-Y) was positively correlated with GBM grade. Knockdown of NF-YC reduced brain tumor size in vivo. High NF-YC expression was linked with reduced patient survival.                                                                             |
| Nuclear unphosphorylated STAT3 correlates with a worse prognosis in human glioblastoma.                                                     | Rodrigues BR, Queiroz-Hazarbasanov N, Lopes MH, et al. | Pathol Res Pract.           | 27013058 | 2016 | Higher nuclear localisation of STAT3 correlated with lower rates of recurrence free and overall survival.                                                                                                                                                          |
| IDH mutation is associated with higher risk of malignant transformation in low-grade glioma.                                                | Leu S, von Felten S, Frank S, Boulay JL, Mariani L.    | J Neu-rooncol.              | 26780338 | 2016 | IDH mutation has been previously linked to longer patient survival and is one of the earliest events in gliomagenesis. Although its presence improves patient survival rates there is a higher chance of malignant transformation.                                 |

|                                                                                                                                                    |                                       |                             |          |      |                                                                                                                                                                                                                                                                                                         |
|----------------------------------------------------------------------------------------------------------------------------------------------------|---------------------------------------|-----------------------------|----------|------|---------------------------------------------------------------------------------------------------------------------------------------------------------------------------------------------------------------------------------------------------------------------------------------------------------|
| Expressions of glia maturation factor- $\beta$ by tumor cells and endothelia correlate with neovascularization and poor prognosis in human glioma. | Kuang XY, Jiang XF, Chen C, et al.    | Onco-target.                | 26515590 | 2016 | High levels of Glia maturation factor- $\beta$ (GMF- $\beta$ ) were associated with higher tumour grade and poor patient prognosis. It promotes gliomagenesis by enhancing neovascularisation.                                                                                                          |
| Pharmacologic Wnt Inhibition Reduces Proliferation, Survival, and Clonogenicity of Glioblastoma Cells.                                             | Kahlert UD, Suwala AK, Koch K, et al. | J Neuro-pathol Exp Neurol.  | 26222502 | 2015 | Inhibition of the WNT pathway via porcupine inhibitor LGK974 with elevated AXIN2 which showed WNT activity reduced by 50%. This caused growth suppression, suppressed proliferation and some cell death.                                                                                                |
| Overexpressed homeobox B9 regulates oncogenic activities by transforming growth factor- $\beta$ 1 in gliomas.                                      | Fang L, Xu Y, Zou L.                  | Biochem Biophys Res Commun. | 24582746 | 2014 | Homeobox B9 is a protein encoding gene on chromosome 17 that regulates gene expression and cell survival. Higher concentration found in GBM. Overexpressed HOXB9 stimulated progression and migration of glioma cells, as well as the tumorigenicity and this was reversed when HOXB9 was knocked down. |
| Tumorigenesis and prognostic role of hepatoma-derived growth factor in human gliomas.                                                              | Hsu SS, Chen CH, Liu GS, et al.       | J Neurocol.                 | 22037800 | 2012 | Knockdown of nuclear Hepatoma-derived growth factor (HDGF) in Glioma cells led to inhibition of cell growth and invasion. HDGF presence is a marker for shorter survival in patients after surgery. Therefore, it can be a prognostic marker and therapeutic target.                                    |

**Table S3.** Tier-2 search results for DNA repair.

| Article Title                                                                                                     | Authors                              | Journal      | PMID     | Year | Outcome                                                                                                                                                                                                                                                                                                   |
|-------------------------------------------------------------------------------------------------------------------|--------------------------------------|--------------|----------|------|-----------------------------------------------------------------------------------------------------------------------------------------------------------------------------------------------------------------------------------------------------------------------------------------------------------|
| The Tumor Suppressor MTUS1/ATIP1 Modulates Tumor Promotion in Glioma: Association with Epigenetics and DNA Repair | Nikhil Ranjan <u>et al.</u>          | Cancers      | 33809019 | 2021 | <i>MTUS1</i> /ATIP1 is downregulated in high grade GBMs and regulates gliomagenesis, progression and therapy resistance. ATIP1 overexpression reduced glioma progression and prolonged survival however, ATIP1 overexpression resulted in radio-resistance.                                               |
| PARP targeting counteracts gliomagenesis through induction of mitotic catastrophe and aggravation of de-          | Jara Majuelos-Melguizo <u>et al.</u> | Onco-target. | 25576921 | 2015 | In PTEN-deficient GBM cells PARP inhibition led to a mitotic catastrophe via inducing severe genomic instability, exacerbated homologous recombination repair (HR) deficiency and down-regulating spindle assembly checkpoint factor BURB1. Combining with EGFR blocker erlotinib retarded gliomagenesis. |

|                                                                                                                                                 |                           |                          |          |      |                                                                                                                                                                                                                                                                                |
|-------------------------------------------------------------------------------------------------------------------------------------------------|---------------------------|--------------------------|----------|------|--------------------------------------------------------------------------------------------------------------------------------------------------------------------------------------------------------------------------------------------------------------------------------|
| iciency in homologous recombination in PTEN-mutant glioma                                                                                       |                           |                          |          |      |                                                                                                                                                                                                                                                                                |
| Mutant IDH1-driven cellular transformation increases RAD51-mediated homologous recombination and temozolomide resistance                        | Shigeo Ohba <u>et al.</u> | Cancer research.         | 25035396 | 2014 | Mutant IDH-1 is associated with enhanced RAD51-mediated homologous recombination DNA repair (HR) and facilitate Temozolomide (TMZ) resistance. This suggests inhibitors of HR could potentially enhance TMZ response in IDH-1 mutant GBMs.                                     |
| Whole exome sequencing-based analysis to identify DNA damage repair deficiency as a major contributor to gliomagenesis in adult diffuse gliomas | Ege Ülgen <u>et al.</u>   | Journal of neurosurgery. | 30952131 | 2019 | DNA damage repair deficiency (DDRd) are predictable and traceable nucleotide alterations in GBMs. Eighty-four percent of tumours had at list 1 DDRd signature, TP53 being the most common somatically altered DDR gene. This suggests DDRd may be important for gliomagenesis. |

**Table S4.** Tier-2 search results for G2/M Arrest.

| Article Title                                                                                                                     | Authors               | Journal                   | PMID     | Year | Outcome                                                                                                                                                                                                                                                       |
|-----------------------------------------------------------------------------------------------------------------------------------|-----------------------|---------------------------|----------|------|---------------------------------------------------------------------------------------------------------------------------------------------------------------------------------------------------------------------------------------------------------------|
| Silencing of ZFP36L2 increases sensitivity to temozolomide through G2/M cell cycle arrest and BAX mediated apoptosis in GBM cells | <u>Che Mat et al.</u> | Molecular Biology Reports | 33590411 | 2021 | Blocking zinc finger protein 36-like 2 (ZFP36L2) via RNA interference (RNAi) delivery in GBM cells promoted cell cycle arrest and lowered cell proliferation. Upregulation of BAX (BCL2-associated X, apoptosis regulator) induced apoptosis was noted.       |
| Inhibition of MMP14 potentiates the therapeutic effect of temozolomide and radiation in gliomas                                   | <u>Ulasov et al</u>   | Cancer Medicine           | 24156018 | 2013 | MMP 14 knockdown led to reduced tumour growth. Treatment with temozolomide and radiotherapy plus MMP14 blockade drastically improved survival of mice with GBM compared to single therapy. Hence MMP14 inhibition sensitized GBM cells to standard treatment. |

**Table S5.** Tier-2 search results for apoptosis.

| Article Title                                                                                                                                          | Authors        | Journal                               | PMID     | Year | Outcome                                                                                                                                                                                                                                                                                                                                                                                                                  |
|--------------------------------------------------------------------------------------------------------------------------------------------------------|----------------|---------------------------------------|----------|------|--------------------------------------------------------------------------------------------------------------------------------------------------------------------------------------------------------------------------------------------------------------------------------------------------------------------------------------------------------------------------------------------------------------------------|
| Circular RNA <i>CDR1as</i> disrupts the p53/MDM2 complex to inhibit Gliomagenesis                                                                      | Lou J et al    | Molecular cancer                      | 32894144 | 2020 | In vitro and in vivo xenograft mouse model, CDR1as, binding to p53 protein, prevents its ubiquitination by MDM2 and subsequent degradation. This restricts glioma tumorigenesis and cell proliferation by inducing cycle arrest and apoptosis.                                                                                                                                                                           |
| RNaseH2A is involved in human gliomagenesis through the regulation of cell proliferation and apoptosis                                                 | Dai B et al    | Oncology reports.                     | 27176716 | 2016 | shRNA silencing inducing RNaseH2A knowdown blocked tumor cells in G0/G1 phase, thus reducing proliferation, viability and increased apoptosis. RNaseH2A also showed to play an important role in several signaling pathways, included IL-6 and FAS, involved in cell proliferation.                                                                                                                                      |
| LINC01198 facilitates gliomagenesis through activating PI3K/AKT pathway.                                                                               | Xie Y, Cheng Y | RNA BIOLOGY VOL. 17, NO. 7, 1040–1052 | 32378450 | 2020 | Silenced LINC01198 curbed glioma cell proliferation and accelerated cell apoptosis. It also activated the PI3 K/AKT pathway to aggravate glioma progression by targeting PIK3 CA and PTEN and impairing PTEN expression in glioma. Activating PI3 K/AKT signalling, it also exerts oncogenic function in gliomagenesis by regulating PIK3CA and PTEN.                                                                    |
| MicroRNA-10b pleiotropically regulates invasion, angiogenicity and apoptosis of tumor cells resembling mesenchymal subtype of glioblastoma multiforme. | Lin J et al    | Cellular death and disease            | 23034333 | 2012 | miR-10b governs invasiveness, angiogenesis, cell growth and apoptosis of U87-2M1 (mesenchymal type) glioma cells – reduced after silencing miR-10b.                                                                                                                                                                                                                                                                      |
| Propofol inhibits Wnt signaling and exerts anticancer activity in glioma cells                                                                         | W. Xu et al    | Oncology Letters                      | 29928428 | 2018 | Propofol is a novel potential Wnt signaling inhibitor, suppresses growth and survival of glioma cells in vitro and in vivo. The results indicate a novel mechanism of anticancer activity for propofol and provide novel insights into the signaling pathways regulated by propofol. The results suggested the possibility for the potential use of propofol as a novel agent for the treatment of patients with glioma. |
| The epidermal growth factor receptor variant type III mutation frequently found                                                                        | H.M. Kim et al | Cell proliferation: Wiley             | 33283409 | 2020 | EGFRvIII mutation-induced astrogenesis and massive cell proliferation in a human brain development model. These results provide us new insights into the mechanisms relating EGFRvIII mutation-mediated gliogenesis and gliomagenesis.                                                                                                                                                                                   |

|                                                                                                                        |                                      |                                             |          |      |                                                                                                                                                                                                                                                                                                                                                                                                                                                                                                                                                                                                 |
|------------------------------------------------------------------------------------------------------------------------|--------------------------------------|---------------------------------------------|----------|------|-------------------------------------------------------------------------------------------------------------------------------------------------------------------------------------------------------------------------------------------------------------------------------------------------------------------------------------------------------------------------------------------------------------------------------------------------------------------------------------------------------------------------------------------------------------------------------------------------|
| in gliomas induces astro-genesis in human cerebral organoids                                                           |                                      |                                             |          |      |                                                                                                                                                                                                                                                                                                                                                                                                                                                                                                                                                                                                 |
| Long noncoding RNA LINC00511 induced by SP1 accelerates the glioma progression through targeting miR-124-3p/CCND2 axis | C. Lin et al                         | Wiley                                       | 30973678 | 2019 | LINC00511 was up-regulated in glioma tissues and overexpression positively correlated with the poor prognosis and advanced pathological stages. LINC00511 stimulates proliferation and invasion of glioma cells in vitro while knockdown repressed tumour growth in vivo. LINC00511 upregulated CCND2 expression through competitively sponging with miR-124-3p. Overall, our finding illuminates that LINC00511 is induced by SP1 (transcription factor) and accelerates the glioma progression through targeting miR-124-3p/CCND2 axis, constructing the SP1/LINC00511/miR-124-3p/CCND2 axis. |
| Sox21 inhibits glioma progression in vivo by forming complexes with Sox2 and stimulating aberrant differentiation      | D. Caglayan, E. Lundin, M. Kastermar | International Journal of Cancer             | 23463365 | 2013 | Transcription factor Sox21 can act as a suppressor gene in gliomagenesis. Induced expression of Sox21 in human glioma cells results in reduced tumor growth and prolonged survival of xenotransplanted mice. Sox21 reduces the stem-cell like properties of the tumor cells, leading to abnormal differentiation, induced apoptosis, and decreased proliferation. The results point to a shift in balance between the counteracting and widely distributed Sox2 and Sox21, revealing the Sox2/Sox21 axis as a target for novel therapy of gliomas.                                              |
| Sorafenib selectively depletes human glioblastoma tumor-initiating cells from primary cultures                         | E. Carra, F. Barberi, D. Marubbi     | Cell Cycle (Landes Bioscience)              | 23324350 | 2013 | Using the sorafenib, the inhibition of two important pathways for GBM biology, MAPK and PI3K/Akt, is obtained leading to the block of proliferation and, most of all, the induction of apoptosis via Mcl-1 inhibition in GBM TICs. Moreover, results demonstrate that sorafenib preferentially affects tumour inducing cells subpopulation, suggests potential use in drug resistance and tumor relapse.                                                                                                                                                                                        |
| Histone deacetylase inhibitors promote glioma cell death by G2 checkpoint abrogation leading to mitotic catastrophe    | M. Cornago et al                     | Cell Death and Disease (Nature) – Macmillan | 25275596 | 2014 | SAHA and VPA, which are more efficient than the chemotherapeutic drug TMZ in killing glioma cells, reduce the expression of proteins involved in processes relevant for tumor growth and survival: G2/M checkpoint gatekeepers, DNA repair mechanisms and proteins involved in mitotic spindle formation and chromosome segregation during mitosis, thus leading to cell death by mitotic catastrophe. These findings support the view that drugs targeting multiple processes are more efficient in killing cancer cells than DNA-damaging agents.                                             |
| Suppression of autophagy impedes glioblastoma development and induces senescence                                       | N. Gam-moh et al                     | Taylor & Francis                            | 27304681 | 2016 | Autophagy inhibition by RNAi on gliomagenesis in a genetically engineered mouse model in GBN model showed significantly inhibited but not completely ablated. This suggests autophagy is partially inhibited to maintain the homeostatic function of autophagy in normal tissues during prolonged treatment.                                                                                                                                                                                                                                                                                    |

|                                                                                                                                                                                     |                        |                           |          |      |                                                                                                                                                                                                                                                                                                                                                                                                                                             |
|-------------------------------------------------------------------------------------------------------------------------------------------------------------------------------------|------------------------|---------------------------|----------|------|---------------------------------------------------------------------------------------------------------------------------------------------------------------------------------------------------------------------------------------------------------------------------------------------------------------------------------------------------------------------------------------------------------------------------------------------|
| Overexpression of N-myc downstream-regulated gene 1 inhibits human glioma proliferation and invasion via phosphoinositide 3-kinase/AKT pathways                                     | W. Ma et al.           | Molecular Medicine Report | 25777142 | 2015 | NDRG1 is downregulated in glioma cells, it may play a role in the regulation of growth and invasion of glioma cells. NDRG1 may serve as a potential diagnostic or prognostic marker, and a novel therapeutic target in the treatment of glioma.                                                                                                                                                                                             |
| Control of glioma cell death and differentiation by PKM2–Oct4 interaction                                                                                                           | M. Morfouace et al     | Cell Death and Disease    | 24481450 | 2014 | Dichloroacetate could be a valuable adjuvant therapy for GBM patients, especially in tumors with a large CSC population but needs to be associated with another anticancer drug.                                                                                                                                                                                                                                                            |
| Long noncoding RNA SNHG12 facilitates the tumorigenesis of glioma through miR-101-3p/FOXP1 axis                                                                                     | Yuchen Sun et al       | Gene                      | 30098431 | 2018 | Long coding RNA (lncRNAs) have a recognised role in gliomagenesis. This study focuses on lncRNA SNHG12. Knockdown of SNHG12 impaired the proliferation, induced the apoptosis in vitro and, meanwhile, inhibited the tumor growth in vivo                                                                                                                                                                                                   |
| Novel internal regulators and candidate miRNAs within miR-379/miR-656 miRNA cluster can alter cellular phenotype of human glioblastoma                                              | Subhashree Nayak et al | Scientific reports        | 29769662 | 2018 | Clustered miRNAs can affect functioning of downstream pathways due to possible coordinated function.<br>Higher expression of the C14MC miRNAs significantly improved glioblastoma prognosis. CRISPR activation of the most efficient internal regulator specifically induced members of the downstream miRNA sub-cluster and apoptosis in glioblastoma cells.                                                                               |
| Notch1 is a prognostic factor that is distinctly activated in the classical and proneural subtype of glioblastoma and that promotes glioma cell survival via the NF-κB(p65) pathway | Long Hai et al         | Cell death and disease    | 29410396 | 2018 | Notch1 signaling is a more complex process in the development of numerous cell and tissue types, including gliomagenesis and progression, and is upregulated in glioma-initiating cells. Notch1 and NF-κB(p65) are highly expressed in the classical and proneural subtypes of GBM. DAPT and shRNA targeting Notch1 decreased NF-κB(p65) expression, suppressed cell proliferation, and induced apoptosis of GBM cells in vitro and in vivo |

|                                                                                                                         |                            |                                |          |      |                                                                                                                                                                                                                                                                                                                                                                                                                                                                                                                                                   |
|-------------------------------------------------------------------------------------------------------------------------|----------------------------|--------------------------------|----------|------|---------------------------------------------------------------------------------------------------------------------------------------------------------------------------------------------------------------------------------------------------------------------------------------------------------------------------------------------------------------------------------------------------------------------------------------------------------------------------------------------------------------------------------------------------|
| LncRNA HSP90AA1-IT1 promotes gliomas by targeting miR-885-5p-CDK2 pathway                                               | Taihong Gao et al          | Onco-target                    | 29088865 | 2017 | ncRNAs are emerging as important regulators in various types of cancers. Downregulation of HSP90AA1-IT1 in the glioma cell lines significantly suppressed cell viability, proliferation, EMT, invasion and migration in addition to an increase in apoptosis and aberrant cell cycle progression.                                                                                                                                                                                                                                                 |
| Long Noncoding RNA HOXA11-AS Functions as miRNA Sponge to Promote the Glioma Tumorigenesis Through Targeting miR-140-5p | Yan Cui et al              | DNA cell biology               | 28832185 | 2017 | Long noncoding RNAs: Loss-of-function experiments revealed that HOXA11-AS knockdown inhibited the proliferation, induced cell cycle arrest at G0/G1 phase, and enhanced the apoptosis.                                                                                                                                                                                                                                                                                                                                                            |
| HP1 $\alpha$ is highly expressed in glioma cells and facilitates cell proliferation and survival                        | Xianliang Lai et al        | Cancer Biomarkers              | 30372668 | 2017 | Depletion of HP1 $\alpha$ (heterochromatin protein 1 $\alpha$ ) and SUV39H1 weakens GOS3 and 1321N1 cell proliferation capacity and results in apoptosis of cells. Furthermore, we find that HP1 $\alpha$ and H3K9me3 are enriched in the FAS and PUMA promoters, which suggests that upregulated HP1 $\alpha$ and H3K9me3 prevent apoptosis by suppressing apoptotic activators. These data indicates that up-regulated HP1 $\alpha$ , SUV39H1, and H3K9me3 in glioma cells are functionally associated with glioma pathogenesis and progression |
| CRNDE Expression Positively Correlates with EGFR Activation and Modulates Glioma Cell Growth                            | Karrie Mei-Yee Kiang et al | Target oncology                | 28493025 | 2017 | CRNDE acts as an oncogene that is highly up-regulated in glioma. Expression of CRNDE correlates with EGFR activation. EGF and EGFR tyrosine kinase inhibitor (TKI) enhance and block the up-regulation of CRNDE expression, respectively, suggesting that EGFR signaling may positively regulate CRNDE expression. CRNDE depletion inhibits glioma cell growth both in vitro and in vivo, and is associated with induced cellular apoptosis with decreased Bcl2/Bax ratio.                                                                        |
| T11TS repress gliomagenic apoptosis of bone marrow hematopoietic stem cells                                             | Somnath Mondal et al       | Journal of cellular physiology | 28233371 | 2017 | T11TS (T11 target structure) is also able to diminish the perforin-granzyme B mediated apoptotic verdict of BMHSCs during gliomagenesis. The anti-apoptotic action of T11TS on glioma associated BMHSCs provide a crucial insight into how T11TS exerts its immunomodulatory action against glioma mediated immune devastation                                                                                                                                                                                                                    |

|                                                                                                                                    |                      |                |          |      |                                                                                                                                                                                                                                                                                                                                                                                                                                                 |
|------------------------------------------------------------------------------------------------------------------------------------|----------------------|----------------|----------|------|-------------------------------------------------------------------------------------------------------------------------------------------------------------------------------------------------------------------------------------------------------------------------------------------------------------------------------------------------------------------------------------------------------------------------------------------------|
| The Inhibition of miRNA-128 on IGF-1-Activating mTOR Signaling Involves in Temozolomide-Induced Glioma Cell Apoptotic Death        | Peng-Hsu Chen et al  | PLOS one       | 27893811 | 2016 | miR-128-inhibited mTOR signaling is involved in TMZ-mediated cytotoxicity. Our findings may provide a better understanding of cytotoxic mechanisms of TMZ involved in glioblastoma development.                                                                                                                                                                                                                                                 |
| The role of transcriptional coactivator TAZ in gliomas                                                                             | Weijie Li et al      | Onco-target    | 27764783 | 2016 | Transcriptional coactivator with PDZ-binding motif (TAZ) is one of the important downstream effectors of Hippo pathway. When orthotopic glioblastoma mouse model implanted with TAZ knocked down cells, glioma growth was inhibited and survival period was prolonged                                                                                                                                                                           |
| Suppression of autophagy impedes glioblastoma development and induces senescence                                                   | Noor Gammoh et al    | Autophagy      | 27304681 | 2016 | Autophagy inhibition suppressed the capacity of KRAS-expressing glial cells to form oncogenic colonies or to survive low serum conditions. Molecular analyses revealed that autophagy-inhibited glial cells were unable to maintain active growth signaling under growth-restrictive conditions and were prone to undergo senescence                                                                                                            |
| FRMD6 inhibits human glioblastoma growth and progression by negatively regulating activity of receptor tyrosine kinases            | Yin Xu et al         | Onco-target    | 27661120 | 2016 | FRMD6 is an Ezrin/Radixin/Moesin (ERM) family protein and a human homologue of Drosophila expanded (ex). Results establish a novel function of FRMD6 in inhibiting human GBM growth and progression and uncover a novel mechanism by which FRMD6 exerts its anti-GBM activity.                                                                                                                                                                  |
| Functional genomics analyses of RNA-binding proteins reveal the splicing regulator SNRPB as an oncogenic candidate in glioblastoma | Bruna R Correa et al | Genome biology | 27287018 | 2016 | NA-binding proteins (RBPs) are master regulators of co- and post-transcriptional events. revealed a prominent oncogenic candidate, SNRPB, which encodes core spliceosome machinery components. To reveal the impact of SNRPB on splicing and gene expression, we performed its knockdown in a GBM cell line followed by RNA sequencing. We found that the affected genes were involved in RNA processing, DNA repair, and chromatin remodeling. |

|                                                                                                                                                                             |                     |                      |          |      |                                                                                                                                                                                                                                                                                                                                                                                                                                                                                                                                          |
|-----------------------------------------------------------------------------------------------------------------------------------------------------------------------------|---------------------|----------------------|----------|------|------------------------------------------------------------------------------------------------------------------------------------------------------------------------------------------------------------------------------------------------------------------------------------------------------------------------------------------------------------------------------------------------------------------------------------------------------------------------------------------------------------------------------------------|
|                                                                                                                                                                             |                     |                      |          |      |                                                                                                                                                                                                                                                                                                                                                                                                                                                                                                                                          |
| DYT-40, a novel synthetic 2-styryl-5-nitroimidazole derivative, blocks malignant glioblastoma growth and invasion by inhibiting AEG-1 and NF- $\kappa$ B signaling pathways | Meijuan Zou et al   | Scientific reports   | 27251589 | 2016 | Astrocyte elevated gene-1 (AEG-1) has been explored as a novel target for human glioma therapy, thus reflecting its potential contribution to gliomagenesis. This article investigated the effect of DYT-40, a novel synthetic 2-styryl-5-nitroimidazole derivative, on cell growth and invasion in glioblastoma (GBM) and uncovered the underlying mechanisms of this molecule. DYT-40 induces the intrinsic mitochondrial pathway of apoptosis and inhibits the epithelial-mesenchymal transition (EMT) and invasion of GBM cell lines |
| RNaseH2A is involved in human gliomagenesis through the regulation of cell proliferation and apoptosis                                                                      | Bin Dai et al       | Oncology reports     | 27176716 | 2016 | RNaseH2A silencing resulted in impaired cell proliferation. clone formation was significantly reduced by RNaseH2A knockdown, which also increased cell apoptosis by approximately 4.5-fold.                                                                                                                                                                                                                                                                                                                                              |
| IDH1R132H in Neural Stem Cells: Differentiation Impaired by Increased Apoptosis                                                                                             | Kamila Rosiak et al | Plos One             | 27145078 | 2016 | Expression of IDH1R132H increases apoptosis susceptibility of neural stem cells and their derivatives. Robust apoptosis causes differentiation deficiency of IDH1R132H-expressing cells.                                                                                                                                                                                                                                                                                                                                                 |
| Hugl-1 inhibits glioma cell growth in intracranial model                                                                                                                    | Xuejiao Liu et al   | Journal of neurology | 26341367 | 2015 | Drosophila lethal giant larvae (lgl) has been reported as a tumor suppressor and could regulate the Drosophila hippo signaling. Human giant larvae-1(Hugl-1), one human homologue of Drosophila lgl, also has been reported to be involved in the development of some human cancers<br>over-expression of Hugl-1 not only inhibited gliomagenesis but also markedly inhibited cell proliferation and promoted the apoptosis of U251 cells in an orthotopic model of nude mice                                                            |

**Table S6.** Tier-2 search results for G1/S progression.

| Article Title                                                                                                             | Authors                                                                                                          | Journal                          | PMID     | Year | Outcome                                                                                                                                                                                       |
|---------------------------------------------------------------------------------------------------------------------------|------------------------------------------------------------------------------------------------------------------|----------------------------------|----------|------|-----------------------------------------------------------------------------------------------------------------------------------------------------------------------------------------------|
| TROAP regulates cell cycle and promotes tumor progression through Wnt/ $\beta$ -Catenin signaling pathway in glioma cells | Zong-Qing Zhao, Xiu-Jie Wu, Yan-Hao Cheng, Yun-Fei Zhou, Xi-Meng Ma, Jian Zhang, Xue-Yuan Heng, Fan Feng         | CNS Neuroscience & Therapeutics  | 34077623 | 2021 | TROAP ((Trophinin Associated Protein) accelerated the progression of gliomagenesis through Wnt/ $\beta$ -Catenin pathway, and TROAP might be considered as a novel target for glioma therapy. |
| Aberrant nuclear lamina contributes to the malignancy of human gliomas                                                    | Shun-qiPei, Xue hui, Wang Xuan, Wang Hao, Huang Huaping, Tao Bing, hua Xie, Aifen Yang, Mengshe ng Qiu, Zhou Tan | Journal of Genetics and Genomics | 34530169 | 2021 | lamins are proposed to be potential oncogene targets for therapeutic treatments of brain tumors.                                                                                              |

**Table S7.** Tier-2 search results for cell cycle progression.

| Article Title                                                                                                                                    | Authors              | Journal                                            | PMID     | Year | Outcome                                                                                                                                                                                                                                                                                                                                                          |
|--------------------------------------------------------------------------------------------------------------------------------------------------|----------------------|----------------------------------------------------|----------|------|------------------------------------------------------------------------------------------------------------------------------------------------------------------------------------------------------------------------------------------------------------------------------------------------------------------------------------------------------------------|
| LRIG2 promotes the proliferation and cell cycle progression of glioblastoma cells in vitro and in vivo through enhancing PDGFR $\beta$ signaling | QUNGE N XIAO et al.  | INTERNATIONAL JOURNAL OF ONCOLOGY                  | 30015847 | 2018 | Targeting LRIG2, the key oncogenic regulator of multiple RTKs signals, appears to be promising for developing novel therapeutic strategies for the future treatment of GBM.                                                                                                                                                                                      |
| Znf179 induces differentiation and growth arrest of human primary glioblastoma multiforme in a p53-dependent cell cycle pathway                  | Kuen-Haur Lee et al. | Nature                                             | 28684796 | 2017 | Znf179 induces neuronal differentiation.<br>Decreased expression of Znf179 in glioma brain tumours.<br>Znf179 overexpression enhances differentiation of GBM cells.<br>p53-p21-p27 cell cycle signaling pathways are involved in Znf179-induced differentiation of GBM cells.<br>Glioma patients with higher Znf179 expression levels have longer survival rates |
| Reciprocal regulation of integrin $\beta$ 4 and KLF4 promotes gliomagenesis through maintaining cancer stem cell traits                          | Binbin Ma et al.     | Journal of Experimental & Clinical Cancer Research | 30658712 | 2019 | Existence of a positive feedback loop between KLF4 (Kruppel Like Factor 4) and ITGB4 (Integrin Subunit Beta 4) that promotes GSC self-renewal and gliomagenesis, suggesting that ITGB4 may be a valuable therapeutic target for glioma.                                                                                                                          |
| Cyclin-dependent kinase 7 is a therapeutic target in high-grade glioma                                                                           | SA Greenall et al.   | Nature                                             | 28504693 | 2017 | CDK7 is crucial for gliomagenesis, CDK7 is a therapeutic target and provide new insight into the cellular processes that are affected by THZ1 and induce antitumor activity.                                                                                                                                                                                     |
| PTPN2 induced by inflammatory response and oxidative stress contributed to glioma progression                                                    | Liquan Wu et al.     | Journal of cellular biochemistry                   | 31241223 | 2019 | PTPN2 ((Protein Tyrosine Phosphatase Non-Receptor Type 2) )was highly overexpressed in gliomas.<br>PTPN2 was greatly induced by inflammation response in T98G cells.<br>PTPN2 was strongly oxidated and inactivated by ROS.                                                                                                                                      |

|                                                                                                                 |                                  |                                                        |          |      |                                                                                                                                                                                                                                                                                                                                                      |
|-----------------------------------------------------------------------------------------------------------------|----------------------------------|--------------------------------------------------------|----------|------|------------------------------------------------------------------------------------------------------------------------------------------------------------------------------------------------------------------------------------------------------------------------------------------------------------------------------------------------------|
|                                                                                                                 |                                  |                                                        |          |      | PTPN2-deficiency promoted apoptosis in T98G cells<br>PTPN2 was upregulated in glioma cell.                                                                                                                                                                                                                                                           |
| The ATPase Pontin is a key cell cycle regulator by amplifying E2F1 transcription response in glioma             | Run Wang et al.                  | Cell death and disease                                 | 33542204 | 2021 | Pontin was overexpressed in gliomas and its higher expression predicted worse prognosis<br>Pontin co-expressed genes were functionally associated with cell cycle control and RNA processing<br>Knockdown of Pontin inhibited cell growth and cell cycle progression in GBM cells<br>The Pontin-affected alternative splicing landscape in GBM cells |
| Quercetin abrogates IL-6/STAT3 signaling and inhibits glioblastoma cell line growth and migration               | Jonathan Michaud-Levesque et al. | Experimental Cell Research                             | 22394507 | 2012 | Quercetin is a potent inhibitor of the IL-6-induced STAT3 signaling pathway in T98G and U87 glioblastoma cells.                                                                                                                                                                                                                                      |
| LncRNA HSP90AA1-IT1 promotes gliomas by targeting miR-885-5p-CDK2 pathway                                       | Taihong Gao et al.               | Oncotarget                                             | 29088865 | 2017 | Significantly upregulated in primary glioma.<br>High level was associated with poor prognosis of glioma patients.<br>Affected the viability of glioma cells<br>Knockdown inhibited the migration, invasion and EMT of the glioma cells.                                                                                                              |
| The RNA-binding protein SRSF1 is a key cell cycle regulator via stabilizing NEAT1 in glioma                     | Xuexia Zhou et al.               | International Journal of Biochemistry and Cell Biology | 31200124 | 2019 | NEAT1, whose stability maintained by SRSF1, implicates gliomagenesis by regulating cell cycle. Both SRSF1 and NEAT1 may serve as promising targets for antineoplastic therapies.                                                                                                                                                                     |
| CD163, a novel therapeutic target, regulates the proliferation and stemness of glioma cells via casein kinase 2 | Taoliang Chen et al.             | Oncogene                                               | 30258108 | 2019 | CD163 overexpression in human glioma correlated with a poor prognosis<br>CD163 regulates both cell cycle progression and the proliferation of glioma cells<br>Silencing of CD163 inhibits glioma tumorigenicity in vivo<br>CD163 is necessary for maintaining the stemness of primary GSCs                                                           |
| Histologically defined intratumoral sequencing                                                                  | Antony Prabhu et al.             | Neuro-oncology                                         | 28541485 | 2017 | Intra-tumoral heterogeneity in glioblastoma is a conserved, predictable consequence to its complex microenvironment, and combinatorial approaches designed to target these unequivocally present tumor biomes may lead to therapeutic gains.                                                                                                         |

|                                                                                                                                                       |                            |                                        |          |      |                                                                                                                                                                                                                                                                                                            |
|-------------------------------------------------------------------------------------------------------------------------------------------------------|----------------------------|----------------------------------------|----------|------|------------------------------------------------------------------------------------------------------------------------------------------------------------------------------------------------------------------------------------------------------------------------------------------------------------|
| uncovers evolutionary cues into conserved molecular events driving gliomagenesis                                                                      |                            |                                        |          |      |                                                                                                                                                                                                                                                                                                            |
| Tumorigenesis and prognostic role of hepatoma-derived growth factor in human gliomas                                                                  | Shu-Shong Hsu et al.       | Journal of Neuro-oncology              | 22037800 | 2017 | HDGF (hepatoma-derived growth factor) expression is correlated with glioma progression                                                                                                                                                                                                                     |
| EZH2 is a negative prognostic factor and exhibits pro-oncogenic activity in glioblastoma                                                              | Junxia Zhanga et al.       | Cancer Letters                         | 25444902 | 2015 | EZH2 overexpression confers a poor prognosis of GBM patients.<br>EZH2 is an independent prognostic factor in GBM patients.<br>Repression of EZH2 induces cell cycle arrest and inhibits tumor growth in vivo.<br>A feedback loop of EZH2 with $\beta$ -catenin/TCF4 and STAT3 signaling exists in gliomas. |
| Comprehensive analysis of the functional microRNA-mRNA regulatory network identifies miRNA signatures associated with glioma malignant progression    | Yongsheng Li et al.        | Oxford Academic Nucleic acids research | 24194606 | 2013 | hsa-miR-524-5p and hsa-miR-628-5p exhibited dominant regulatory activities. Therefore, network-based biomarkers are expected to be more effective and provide deep insights into the molecular mechanism of glioma malignant progression                                                                   |
| Ehd3, a regulator of vesicular trafficking, is silenced in gliomas and functions as a tumor suppressor by controlling cell cycle arrest and apoptosis | Sahiti Chukkappalli et al. | Oxford Academic Carcinogenesis         | 24306026 | 2014 | Loss of EHD3 expression in gliomas, including low-grade astrocytomas, suggesting that this is an early event in gliomagenesis<br>Ehd3 functions as a tumor suppressor gene and loss of its expression is a very common event in gliomas.                                                                   |

**Table S8.** Tier-3 search results for theranostics in GBM.

| Article Title                                                                                                                                                                               | Authors              | Journal                                            | PMID     | Year | Outcome                                                                                                                                                                                                                                                                                                                                                                                                                                                                                                                                                                                                                                                                                                                                           |
|---------------------------------------------------------------------------------------------------------------------------------------------------------------------------------------------|----------------------|----------------------------------------------------|----------|------|---------------------------------------------------------------------------------------------------------------------------------------------------------------------------------------------------------------------------------------------------------------------------------------------------------------------------------------------------------------------------------------------------------------------------------------------------------------------------------------------------------------------------------------------------------------------------------------------------------------------------------------------------------------------------------------------------------------------------------------------------|
| Dramatic response of BRAF V600E-mutant epithelioid glioblastoma to combination therapy with BRAF and MEK inhibitor: establishment and xenograft of a cell line to predict clinical efficacy | Yu Kanemaru et al.   | Acta Neuropathologica Communications               | 31345255 | 2019 | <i>BRAF</i> V600E mutation, associated with aggressive epithelioid GBMs responds well to combined treatment with BRAF and MEK inhibitors.                                                                                                                                                                                                                                                                                                                                                                                                                                                                                                                                                                                                         |
| miR-504 suppresses mesenchymal phenotype of glioblastoma by directly targeting the FZD7-mediated Wnt- $\beta$ -catenin pathway                                                              | Qiang Liu et al.     | Journal of Experimental & Clinical Cancer Research | 31419987 | 2019 | miR-504 suppresses GBM mesenchymal transition by inhibiting FZD7 expression and negatively regulating Wnt- $\beta$ -catenin pathway.                                                                                                                                                                                                                                                                                                                                                                                                                                                                                                                                                                                                              |
| The miR-26a/AP-2 $\alpha$ /Nanog signaling axis mediates stem cell self-renewal and temozolomide resistance in glioma                                                                       | Wenhuan Huang et al. | Theranostics                                       | 31534499 | 2019 | AP-2 $\alpha$ reduces the stemness and TMZ resistance of glioma by inhibiting the Nanog/Sox2/CD133 axis and IL6/STAT3 signalling pathways.                                                                                                                                                                                                                                                                                                                                                                                                                                                                                                                                                                                                        |
| New insights for precision treatment of glioblastoma from analysis of single-cell lncRNA expression                                                                                         | Meng et al           | J Cancer Res Clin Oncol.                           | 33693962 | 2021 | Single cell long non-coding RNA (lncRNA) expression used to re-profile GBM with evidence from TCGA, more representative of GBM heterogeneity. 3 patient populations identified, with 4 cell subtypes.<br>Population 1: demonstrated cell subtypes 2 and 3 with lnc markers: LINC00461 and LINC00339 involved in cell proliferation. LINC00339 is blocked by avasimibe and inhibits cell tumorigenicity<br>Population 2: recognised by MALAT1 it confers chemotherapy resistance by blocking miRNA-203 to enhance thymidylate synthase, improves response to temozolomide.<br>Population 3: best survival prognosis, it expressed MEG3 – this blocks GBM growth and apoptosis. MEG3 is associated with lower WHO grade and higher Karnofsky score. |

|                                                                                                                                                                |                                           |                                      |          |      |                                                                                                                                                                                                                                                                                                                                                                                                                                                                                                                                   |
|----------------------------------------------------------------------------------------------------------------------------------------------------------------|-------------------------------------------|--------------------------------------|----------|------|-----------------------------------------------------------------------------------------------------------------------------------------------------------------------------------------------------------------------------------------------------------------------------------------------------------------------------------------------------------------------------------------------------------------------------------------------------------------------------------------------------------------------------------|
| Predictive MGMT status in a homogeneous cohort of IDH wildtype glioblastoma Patients                                                                           | Josefine Radke et al.                     | Acta Neuropathologica Communications | 31167648 | 2019 | Methylation status of MGMT can be classified as high (>20%), low (10-20%) and unmethylated (<20%) where high methylation levels positively correlate with progression-free and overall survival.                                                                                                                                                                                                                                                                                                                                  |
| Genomic alterations predictive of response to radiosurgery in recurrent IDH-WT glioblastoma                                                                    | Dono et al.                               | J Neurooncol.                        | 33492602 | 2021 | Recurrent IDH GBM patients with PTEN mutations had a lengthier progression free survival and overall survival in response to SRS. This prognostic marker can detect those most likely to response to SRS.                                                                                                                                                                                                                                                                                                                         |
| (68)Ga-Pentixafor-PET/CT for Imaging of Chemokine Receptor 4 Expression in Glioblastoma.                                                                       | Lapa C, Lückerrath K, Kleinlein I, et al. | Theranostics                         | 26909116 | 2016 | Chemokine receptor-4 (CXCR4) is overexpressed in GBM and is associated with poor survival. Direct imaging of CXCR-4 with PET or CT scans with a CXCR4 ligand 68Ga-Pentixafor. This method to quantify CXCR-4 in GBM patients in the future and to select patient who may benefit from CXCR4-directed therapy.                                                                                                                                                                                                                     |
| <sup>177</sup> Lu-/ <sup>68</sup> Ga-PSMA Theranostics in Recurrent Glioblastoma Multiforme: Proof of Concept (FAV)                                            | Kumar et al.                              | Clinical Nuclear Medicine            | 32558721 | 2020 | Case report of 37 y.o male with MRI confirmed Lt temporal GBM. Exploratory Ga-PSMA PET/CT demonstrated PSMA expression in the recurrent lesion. After 3 cycles of Lu-PSMA-617, Ga-PSMA PET/CT showed significant reduction in PSMA uptake and regression in size of lesion on MRI with improvement in patient's symptoms and performance status.                                                                                                                                                                                  |
| Multiparametric magnetic resonance imaging in the assessment of anti-EGFRvIII chimeric antigen receptor T cell therapy in patients with recurrent glioblastoma | Wang et al.                               | British Journal of Cancer            | 30478409 | 2019 | EGFRvIII targeted chimeric antigen receptor T (CAR-T) cell therapy has recently been reported for treating glioblastomas (GBMs). This paper showed a group of 10 patients who underwent multiparametric MRI at baseline, 1, 2 and 3 months after CAR-T therapy. Logistic regression model derived progression probabilities (PP) using imaging parameters were used to assess treatment response. Results indicate that multiparametric MRI may be helpful in monitoring CAR-T related early therapeutic changes in GBM patients. |

**Table S9.** Tier-4 search results for vaccines in GBM.

| Article Title                                                                                                                                                     | Authors       | Journal                            | PMID     | Year | Outcome                                                                                                                                                                                                                                                                                                                        |
|-------------------------------------------------------------------------------------------------------------------------------------------------------------------|---------------|------------------------------------|----------|------|--------------------------------------------------------------------------------------------------------------------------------------------------------------------------------------------------------------------------------------------------------------------------------------------------------------------------------|
| A Phase I Study of Autologous Dendritic Cell Vaccine Pulsed with Allogeneic Stem-like Cell Line Lysate in Patients with Newly Diagnosed or Recurrent Glioblastoma | Hu et al.     | Clinical Cancer Research           | 34862245 | 2021 | Autologous dendritic cell vaccines pulsed with lysate originating from GBM stem-like cell lines was safe and without significant side effects.                                                                                                                                                                                 |
| A phase I study of the WT2725 dosing emulsion in patients with advanced malignancies                                                                              | Fu et al.     | Scientific Reports                 | 34785698 | 2021 | Wilms' tumor gene 1 (WT1) overexpressed GBM derived oligopeptide vaccine WT2725 produced significant immune response by inducing cytotoxic T-lymphocytes leading to cell lysis and attenuation cell proliferation. Third of patients (n=20) survived >1 year. Progression free survival 59 days and overall survival 309 days. |
| Immunogenic Cell Death Induced by Chemoradiotherapy of Novel pH-Sensitive Cargo-Loaded Polymersomes in Glioblastoma                                               | He et al.     | International journal Nanomedicine | 34712045 | 2021 | Angiopep-2-conjugated pH-sensitive polymersomes (Au-DOX@PO-ANG) a nanoparticle that crosses the blood brain barrier. Au-DOX@PO-ANG in conjunction with radiotherapy promotes GBM cells death which stimulates dendritic cells maturation via DAMPs and causes Tumour antigen specific T cell to immunogenic cell death.        |
| Identification of Tumor Antigens and Immune Landscape in Glioblastoma for mRNA Vaccine Development                                                                | Ye at al.     | Frontiers Genetics                 | 34527020 | 2021 | Prognostic mRNA antigens: ARPC1B and HK3 identified from TCGA were positively correlated with antigen presenting cells in GBMs validating role in immune response. Immune subtype 2 had “pro-inflammatory features” better response to vaccines.                                                                               |
| Distinct difference in tumor-infiltrating immune cells between Wilms' tumor gene 1 peptide vaccine and anti-programmed cell death-1 antibody therapies            | Yokota et al. | Neurooncology Advances             | 34355173 | 2021 | Wilms' tumor gene 1 (WT1) peptide vaccine and anti-programmed cell death-1 (anti-PD-1) combination improved mice survival compared with monotherapy.                                                                                                                                                                           |
| MR1 Tetramer-Based Artificial APCs Expand MAIT Cells from Human                                                                                                   | Priya et al.  | Immunohorizons                     | 34172533 | 2021 | Mucosal-associated invariant T cells (MAIT) amplified from human peripheral blood using artificial MR1 tetramer APCs retained cytotoxic activity against GBM cells.                                                                                                                                                            |

|                                                                                                                                               |                        |                                                         |          |      |                                                                                                                                                                                                       |
|-----------------------------------------------------------------------------------------------------------------------------------------------|------------------------|---------------------------------------------------------|----------|------|-------------------------------------------------------------------------------------------------------------------------------------------------------------------------------------------------------|
| Peripheral Blood That Effectively Kill Glioblastoma Cells                                                                                     |                        |                                                         |          |      | highlights role of MAIT.                                                                                                                                                                              |
| BRD4 inhibition boosts the therapeutic effects of epidermal growth factor receptor-targeted chimeric antigen receptor T cells in glioblastoma | Xia et al.             | Molecular Therapy: the journal of American gene society | 34058385 | 2021 | Epigenetic regulator BRD4 inhibitor JQ1 prevented stimulation of immunosuppressive genes to augment EGFR CAR-T (chimeric antigen receptor T) cell action in attenuating growth and metastasis in GBM. |
| 90K predicts the prognosis of glioma patients and enhances tumor lysate-pulsed DC vaccine for immunotherapy of GBM in vitro                   | Zeng et al.            | Aging (Albany NY)                                       | 33686953 | 2021 | 90K (tumour associated antigen) potentiated the effect of apoptosis U251-Dendritic cell vaccine to kill GBM cells via increasing cytotoxic T cell activity.                                           |
| New generation of DNA-based immunotherapy induces a potent immune response and increases the survival in different tumor models               | Lopes et al.           | Journal for immunotherapy of cancer                     | 33795383 | 2021 | Viral glycoprotein employed as a carrier of T cell tumor epitopes, prior to tumour debulk results in longer remission and survival. It enhanced cytotoxic T cell activity against GBM cells.          |
| Malignant Glioma Therapy by Vaccination with Irradiated C6 Cell-Derived Microvesicles Promotes an Antitumoral Immune Response                 | Benjamín Pineda et al. | Molecular Therapy                                       | 31204210 | 2019 | Vaccination with irradiated cell-derived microvesicles led to reduction of tumour volume and increased immune cell infiltration of the implanted tumour tissue.                                       |
| Impaired circulating myeloid CD1c+ dendritic cell function in human glioblastoma is restored by                                               | Jason Adhikaree et al. | Oncoimmunology                                          | 31143512 | 2019 | Inhibition of p38 restored GBM related dendritic cell dysfunction by restoring IL-12:IL-10 ratio leading to enhanced T-cell proliferation and interferon-gamma (IFN $\gamma$ ) production.            |

|                                                                                                                                                                                             |                         |                                      |          |      |                                                                                                                                                                                                                                                                                                                                  |
|---------------------------------------------------------------------------------------------------------------------------------------------------------------------------------------------|-------------------------|--------------------------------------|----------|------|----------------------------------------------------------------------------------------------------------------------------------------------------------------------------------------------------------------------------------------------------------------------------------------------------------------------------------|
| p38 inhibition – implications for the next generation of DC vaccines                                                                                                                        |                         |                                      |          |      |                                                                                                                                                                                                                                                                                                                                  |
| A Randomized Double-Blind Placebo-Controlled Phase II Trial of Dendritic Cell Vaccine ICT-107 in Newly Diagnosed Patients with Glioblastoma                                                 | Patrick Y. Wen et al    | Clinical Cancer Research             | 31320597 | 2019 | Immunization with ICT-107, autologous DC pulsed with GBM-associated antigens, significantly improved progression-free survival with maintenance of quality of life.                                                                                                                                                              |
| Immunological analysis of phase II glioblastoma dendritic cell vaccine (Audencel) trial: immune system characteristics influence outcome and Audencel up-regulates Th1-related immunovariab | Friedrich Erhart et al. | Acta Neuropathologica Communications | 30518425 | 2018 | DC immunotherapy against GBM stimulates the immune system especially Th-1 related immunovariab                                                                                                                                                                                                                                   |
| Neoantigen vaccine generates intratumoral T cell responses in phase Ib glioblastoma trial                                                                                                   | Derin B Keskin et al.   | Nature                               | 30568305 | 2019 | Personalized neoantigen -targeting vaccination led to generation of polyfunctional neoantigen-specific CD4+ and CD8+ T cell responses as well as increased T-cell infiltration of the tumour.                                                                                                                                    |
| Phase I/II trial testing safety and immunogenicity of the multi-peptide IMA950/poly-ICLC vaccine in newly diagnosed adult malignant astrocytoma patients                                    | Denis Migliorini et al. | Neuro-Oncology                       | 30753611 | 2019 | Combining IMA950 peptide vaccine with poly-ICLC led to multi-peptide CD8 and sustained T-helper 1 CD4 T-cell responses.                                                                                                                                                                                                          |
| Actively personalized vaccination trial for newly diagnosed glioblastoma                                                                                                                    | Hilf N et al.           | Nature.                              | 30568303 | 2019 | Phase I trial GAPVAC-101 of the Glioma Actively Personalized Vaccine Consortium (GAPVAC), where they used personalised vaccines with unmutated antigen and neoepitopes as therapy for newly diagnosed gliomas.15 patients with GBM positive for human leukocyte antigen (HLA)-A*02:01 or HLA-A*24:02 were treated with a vaccine |

|                                                                                                                                                                                                 |                       |                            |          |      |                                                                                                                                                                                                                                                                                                                                                                                                                                     |
|-------------------------------------------------------------------------------------------------------------------------------------------------------------------------------------------------|-----------------------|----------------------------|----------|------|-------------------------------------------------------------------------------------------------------------------------------------------------------------------------------------------------------------------------------------------------------------------------------------------------------------------------------------------------------------------------------------------------------------------------------------|
|                                                                                                                                                                                                 |                       |                            |          |      | (APVAC1) derived from unmutated antigens and then followed by treatment with APVAC2 (targets neoepitopes).<br>This treatment showed excellent safety and strong immunogenicity i.e. responses of central memory CD8+ T cells and CD4+ T cell responses of T helper 1 type against predicted neoepitopes.                                                                                                                            |
| Immunological analysis of phase II glioblastoma dendritic cell vaccine (Audencel) trial: immune system characteristics influence outcome and Audencel up-regulates Th1-related immunovariables. | Erhart F et al.       | Acta Neuropathol Commun.   | 30518425 | 2018 | Audencel- a DC based cellular cancer immunotherapy against GBM. They found patient with GBM with favourable anti-tumour characteristics showed longer survival rates. They deduced that even though Audencel's previous failure to induce a significant clinical response, it did have an effect on the immune system and its effect depends on the state of the immune system as it seems to stimulate immune systems of patients. |
| A randomized, double-blind, phase III trial of personalized peptide vaccination for recurrent glioblastoma                                                                                      | Narita Y et al.       | Neuro Oncol.               | 30500939 | 2019 | A Phase III trial of personalized peptide vaccination (PPV) for human leukocyte antigen (HLA)-A24+ recurrent glioblastoma. Trial failed to meet primary or secondary endpoints.                                                                                                                                                                                                                                                     |
| Audencel Immunotherapy Based on Dendritic Cells Has No Effect on Overall and Progression-Free Survival in Newly Diagnosed Glioblastoma: A Phase II Randomized Trial.                            | Buchroithner J et al. | Cancers (Basel).           | 30301187 | 2018 | DC (antigen-presenting cells) were used in multicentric randomized open-label phase II study by tumor lysate-charged autologous DCs (Audencel). They found no difference in progression free survival in control and vaccine group.                                                                                                                                                                                                 |
| Treatment of Human Glioblastoma with a Live Attenuated Zika Virus Vaccine Candidate                                                                                                             | Chen Q et al.         | mBio.                      | 30228241 | 2018 | Paper explored the use of live attenuated ZIKV vaccine candidate (ZIKV-LAV) as a GBM treatment. They found it has greater neurovirulence that of the licensed Japanese encephalitis virus LAV 14-14-2 and showed no neurological abnormalities in the injected mice. Therefore, there may be room for further study of ZIKV-LAV for GBM treatment.                                                                                  |
| Molecular subgroups and B7-H4 expression levels predict responses to den-                                                                                                                       | Yao Y et al.          | Cancer Immunol Immunother. | 30159779 | 2018 | DC based vaccination in a double-blind, placebo-controlled phase II clinical trial. Participants were separated into different molecular subgroups based on the mutation status of IDH1/2 and telomerase reverse transcriptase (TERT). Their results showed IDH1 wild                                                                                                                                                               |

|                                                                                                                                                                             |                         |                    |                          |      |                                                                                                                                                                                                                                                                                                                                                                                                                                                                                                                                                                                                |
|-----------------------------------------------------------------------------------------------------------------------------------------------------------------------------|-------------------------|--------------------|--------------------------|------|------------------------------------------------------------------------------------------------------------------------------------------------------------------------------------------------------------------------------------------------------------------------------------------------------------------------------------------------------------------------------------------------------------------------------------------------------------------------------------------------------------------------------------------------------------------------------------------------|
| dritic cell vaccines in glioblastoma: an exploratory randomized phase II clinical trial.                                                                                    |                         |                    |                          |      | type TERT mutation status and low B7-H4 expression identified subgroups of GBM patients more responsive to GSC DCV-based specific active-immunotherapy.                                                                                                                                                                                                                                                                                                                                                                                                                                        |
| A Dendritic Cell-Targeted Adenoviral Vector Facilitates Adaptive Immune Response Against Human Glioma Antigen (CMV-IE) and Prolongs Survival in a Human Glioma Tumor Model. | Kim JW et al..          | Neurotherapeutics. | 30027430                 | 2018 | DC based immunization approach has the significant therapeutic potential for patients with high-grade gliomas                                                                                                                                                                                                                                                                                                                                                                                                                                                                                  |
| Predictors of Response to Autologous Dendritic Cell Therapy in Glioblastoma Multiforme.                                                                                     | Jan CI et al..          | Front Immunol.     | 29910795                 | 2018 | 27 patients who received DC vaccines post surgically along with conventional treatment with radiotherapy and temozolamide and compared them with 20 patient with the conventional treatment for GBM without DC vaccines.<br>They found younger age, gross resection of tumour, tumour infiltrating lymphocytes or peripheral blood mononuclear cells with lower PD-1+/CD8+ ratio were predictor of longer survival rates.                                                                                                                                                                      |
| Tumor lysate-loaded Bacterial Ghosts as a tool for optimized production of therapeutic dendritic cell-based cancer vaccines.                                                | Dobrovolskienė N et al. | Vaccine.           | 29895501                 | 2018 | Enhanced DC vaccines effects by using bacterial ghosts as a delivery system. Bacterial ghosts are empty envelopes of gram negative bacteria. They found they were an excellent method of induction of immunogenic DC maturation and loading with tumour antigens. They compared it to the convention method of lipopolysaccharide (LPS) plus interferon- $\gamma$ cocktail. They found the Bacterial ghost method had superior CD8+ T cell activation                                                                                                                                          |
| Zika virus-based immunotherapy enhances long-term survival of rodents with brain tumors through upregulation of memory T-cells                                              | Andrew T Crane et al.   | Plos ONE           | <a href="#">33002018</a> | 2020 | Zika virus (ZIKV) is known to exhibit tropism for brain tumour cells and has been demonstrated to have an oncolytic effect. Mice bearing malignant intracranial GL261 tumors were subcutaneously vaccinated with irradiated GL261 cells previously infected with the ZIKV. Mice also received intracranial injections of live ZIKV, irradiation attenuated ZIKV, or irradiated GL261 cells previously infected with ZIKV. Long-term survivors were rechallenged with a second intracranial tumor to examine their immune response and look for the establishment of protective memory T-cells. |

|                                                                                                                           |                                |                                  |                          |      |                                                                                                                                                                                                                                                                                                                                                                                                                                                                                                                                                                                                                                                                                                 |
|---------------------------------------------------------------------------------------------------------------------------|--------------------------------|----------------------------------|--------------------------|------|-------------------------------------------------------------------------------------------------------------------------------------------------------------------------------------------------------------------------------------------------------------------------------------------------------------------------------------------------------------------------------------------------------------------------------------------------------------------------------------------------------------------------------------------------------------------------------------------------------------------------------------------------------------------------------------------------|
|                                                                                                                           |                                |                                  |                          |      | Subcutaneous vaccination plus intracranial irradiation attenuated ZIKV or intracranial irradiated GL261 cells previously infected with ZIKV exhibited the greatest extensions to overall survival                                                                                                                                                                                                                                                                                                                                                                                                                                                                                               |
| Activation of 4-1BBL+ B cells with CD40 agonism and IFN $\gamma$ elicits potent immunity against glioblastoma             | Catalina Lee-Chang et al.      | Journal of experimental medicine | <a href="#">32991668</a> | 2021 | B cell-based vaccine (BVax) that consists of 4-1BBL+ B cells activated with CD40 agonism and IFN $\gamma$ stimulation. Bvax migrates to key secondary lymphoid organs and is proficient at antigen cross-presentation, which promotes both the survival and the functionality of CD8+ T cells. A combination of radiation, BVax, and PD-L1 blockade conferred tumor eradication in 80% of treated tumor-bearing animals. elicited immunological memory that prevented the growth of new tumors upon subsequent reinjection in cured mice. GBM patient-derived BVax was successful in activating autologous CD8+ T cells; these T cells showed a strong ability to kill autologous glioma cells. |
| Peptide Vaccine Combined Adjuvants Modulate Anti-tumor Effects of Radiation in Glioblastoma Mouse Model                   | Thi-Anh-Thuy Tran et al.       | Frontiers immunology             | <a href="#">32733437</a> | 2020 | Immunotherapy comprising a branched multi-peptide plus PADRE, poly-ICLC, and anti-PD1 could potentially enhance the anti-tumor effects of radiotherapy in a glioblastoma mouse model                                                                                                                                                                                                                                                                                                                                                                                                                                                                                                            |
| CD133 mRNA-Loaded Dendritic Cell Vaccination Abrogates Glioma Stem Cell Propagation in Humanized Glioblastoma Mouse Model | Angelique Sao-Mai Sy Do et al. | Molecular therapy oncology       | <a href="#">32728617</a> | 2020 | CD133 is a cell surface antigen that is present on glioma stem cells and has been used to prospectively isolate glioma stem cells. confirmed the robust simultaneous activation of CD8- and CD4-positive T cells by dendritic cell vaccination with modified CD133 mRNA leading to a potent and long-lived immune response, with subsequent abrogation of CD133-positive glioma stem cell propagation and tumor growth.                                                                                                                                                                                                                                                                         |
| Once, Twice, Three Times a Finding: Reproducibility of Dendritic Cell Vac-                                                | Kristen A Batich et al.        | Clinical cancer research         | <a href="#">32719000</a> | 2020 | Conducted three separate clinical trials utilizing cytomegalovirus (CMV)-specific DC vaccines in patients with newly diagnosed glioblastoma whereby each follow-up study had nearly doubled in sample size. Follow-up data from the first blinded, randomized phase II clinical trial ( <a href="#">NCT00639639</a> ) revealed that nearly one third of this cohort is without tumor recurrence at 5 years from diagnosis. A second clinical trial ( <a href="#">NCT00639639</a> ) resulted in a 36% survival rate at 5 years from diagnosis. Results of the first two-arm trial                                                                                                                |

|                                                                                                                                                                |                      |                                    |                          |      |                                                                                                                                                                                                                                                                                                                                                                                                             |
|----------------------------------------------------------------------------------------------------------------------------------------------------------------|----------------------|------------------------------------|--------------------------|------|-------------------------------------------------------------------------------------------------------------------------------------------------------------------------------------------------------------------------------------------------------------------------------------------------------------------------------------------------------------------------------------------------------------|
| cine Trials Targeting Cytomegalovirus in Glioblastoma                                                                                                          |                      |                                    |                          |      | ( <a href="#">NCT00639639</a> ) showed increased migration of the DC vaccine to draining lymph nodes, and this increased migration has been recapitulated in our larger confirmatory clinical study ( <a href="#">NCT02366728</a> ). We have now observed that nearly one third of the glioblastoma study patient population receiving CMV-specific DC vaccines results in exceptional long-term survivors. |
| Expansion of effector and memory T cells is associated with increased survival in recurrent glioblastomas treated with dendritic cell immunotherapy            | Marica Eoli et al.   | Neuro-oncology advances            | <a href="#">32642658</a> | 2019 | In patients with GBM recurrence the immune-mediated effects of DC immunotherapy loaded with autologous tumor lysate combined with temozolomide (TMZ) or tetanus toxoid (TT). They found that TT preconditioning of the vaccine site and lack of TMZ could contribute to the efficacy of DC immunotherapy by inducing an effector response, memory, and helper T-cell generation.                            |
| Feasibility of dendritic cell-based vaccine against glioblastoma by using cytoplasmic transduction peptide (CTP)-fused protein antigens combined with anti-PD1 | Young-Hee Kim et al. | Human vaccines and immunotherapies | <a href="#">32401608</a> | 2020 | DC immunotherapy was pulsed with CTP-fused protein antigens combined with programmed cell death protein 1 blockade (anti-PD1). Using CTP-fused protein antigens for DC vaccine preparation along with PD1 blockade could be an effective immunotherapy strategy for GBM.                                                                                                                                    |
| Clinical and histopathological analyses of VEGF receptors peptide vaccine in patients with primary glioblastoma - a case series                                | Ryota Tamura et al.  | BMC cancer                         | <a href="#">32164575</a> | 2020 | VEGFR1 and 2 vaccination may have a preliminary synergistic effect when administered with TMZ. The limitation of the present study was the paucity of the number of the samples. Further studies involving more patients are warranted to confirm the findings of this study.                                                                                                                               |

|                                                                                                                                           |                             |                                  |                          |      |                                                                                                                                                                                                                                                                                                                                                                                                                                                                                                                                                      |
|-------------------------------------------------------------------------------------------------------------------------------------------|-----------------------------|----------------------------------|--------------------------|------|------------------------------------------------------------------------------------------------------------------------------------------------------------------------------------------------------------------------------------------------------------------------------------------------------------------------------------------------------------------------------------------------------------------------------------------------------------------------------------------------------------------------------------------------------|
| Treatment of an aggressive orthotopic murine glioblastoma model with combination checkpoint blockade and a multivalent neoantigen vaccine | Connor J Liu et al.         | Neuro oncology                   | <a href="#">32133512</a> | 2020 | Endogenous neoantigen specific CD8+ T cells within an $\alpha$ PD-L1 resistant murine GBM and show that neoantigen vaccination significantly augments survival benefit in combination with $\alpha$ PD-L1 treatment.                                                                                                                                                                                                                                                                                                                                 |
| Tumor-associated antigen-based personalized dendritic cell vaccine in solid tumor patients                                                | Qian-Ting Wang et al.       | Cancer immunology, immunotherapy | <a href="#">32078016</a> | 2020 | Tumor-associated antigens (TAAs) have been tested in various clinical trials. Tumor samples from patients were first analyzed to identify overexpressed TAAs. Autologous DCs were then transfected with pre-manufactured mRNAs encoding the full-length TAAs. A total of ten patients were treated with DC vaccines transfected with personalized TAA panels containing 3-13 different TAAs. The treated patients were associated with favorable overall survival when compared to patients who received standard treatment in the same institution. |
| Convection-enhanced delivery of temozolomide and whole cell tumor immunizations in GL261 and KR158 experimental mouse gliomas             | Julio Enríquez Pérez et al. | BMC cancer research              | <a href="#">33109586</a> | 2017 | Immunotherapy synergized with CED-TMZ in the GL261 model and cured animals in the KR158 model. Single bolus administration of TMZ was effective with a narrower therapeutic window than CED-TMZ. Combined CED-TMZ and immunotherapy led to an increase in the intratumoral influx of T-cells.                                                                                                                                                                                                                                                        |
| Alpha-type-1 Polarized Dendritic Cell-based Vaccination in Newly Diag-                                                                    | Koichi Mitsuya et al.       | Anti-cancer research             | <a href="#">33109586</a> | 2020 | Sixteen newly diagnosed patients with high-grade gliomas were enrolled in a phase II study of the $\alpha$ -type-1 DC vaccine. DCs obtained from the culture of enriched monocytes in the presence of a cytokine cocktail, were pulsed with a cocktail of 5 synthetic peptides and cryopreserved until injection into patients.                                                                                                                                                                                                                      |

|                                                                                                                                                                                           |                     |                 |          |      |                                                                                                                                                                                                                                                                                                                                                                                                                                                                                                                                                                                                                                                           |
|-------------------------------------------------------------------------------------------------------------------------------------------------------------------------------------------|---------------------|-----------------|----------|------|-----------------------------------------------------------------------------------------------------------------------------------------------------------------------------------------------------------------------------------------------------------------------------------------------------------------------------------------------------------------------------------------------------------------------------------------------------------------------------------------------------------------------------------------------------------------------------------------------------------------------------------------------------------|
| nosed High-grade Glioma: A Phase II Clinical Trial                                                                                                                                        |                     |                 |          |      | Peptide-cocktail-pulsed $\alpha$ -type-1 DC vaccines have a potential therapeutic effect on survival when used in combination with the standard regimen, which is partly based on IL-12-IFN- $\gamma$ -mediated T-cell activation.                                                                                                                                                                                                                                                                                                                                                                                                                        |
| First results on survival from a large Phase 3 clinical trial of an autologous dendritic cell vaccine in newly diagnosed glioblastoma                                                     | Liau LM et al.      | J Transl Med.   | 29843811 | 2018 | Phase 3 trial was conducted and DC vaccines were added to the conventional method of treating GBMs with resection and temozolomide. They found it was safe to add dendritic cell vaccines and could potentially elongate survival.                                                                                                                                                                                                                                                                                                                                                                                                                        |
| Heat shock protein peptide complex-96 vaccination for newly diagnosed glioblastoma: a phase I, single-arm trial.                                                                          | Ji N, Zhang et al.  | JCI Insight.    | 29769450 | 2018 | Single-arm, phase I study in which adult patients were vaccinated with HSPPC-96 (Heat shock protein peptide complex-96) in combination with the standard treatment for newly diagnosed GBM after surgical resection. They found that it was safe treatment with increased efficacy of GBM treatment.                                                                                                                                                                                                                                                                                                                                                      |
| Survival gain in glioblastoma patients treated with dendritic cell immunotherapy is associated with increased NK but not CD8+ T cell activation in the presence of adjuvant temozolomide. | Pellegatta S et al. | Oncoimmunology. | 29632727 | 2018 | Two-stage phase II study where patient received dendritic cell vaccine after standard therapy with temozolomide. Dendritic cell vaccine showed a activation of NK cells which translated to a prolonged survival but did not activate CD8+ T cells.                                                                                                                                                                                                                                                                                                                                                                                                       |
| Circulating CD9+/GFAP+/survivin+ exosomes in malignant glioma patients following survivin vaccination.                                                                                    | Galbo PM Jr et al.  | Oncotarget.     | 29383115 | 2017 | Low levels of CD9+/GFAP+/SVN+ exosomes in cancer free individuals although CD9+/GFAP+ exosomes were present in small numbers. They demonstrated that patients with malignant gliomas had CD9+/GFAP+/SVN+ and CD9+/SVN+ exosomes. Flow cytometry to was used for quantitative measurements of these exosomes who had undergone treatment with anti-survivin vaccine (SurVaxM). They found that patients with longer time to tumour progression showed a decrease in CD9+/SVN+ and CD9+/GFAP+/SVN+ exosomes following survivin vaccination as compared to those with shorter time to tumour progression exhibited increased exosomes regardless of SurVaxM. |

|                                                                                                                                                                       |                       |                |          |      |                                                                                                                                                                                                                                                                                                                                                                                                                                                          |
|-----------------------------------------------------------------------------------------------------------------------------------------------------------------------|-----------------------|----------------|----------|------|----------------------------------------------------------------------------------------------------------------------------------------------------------------------------------------------------------------------------------------------------------------------------------------------------------------------------------------------------------------------------------------------------------------------------------------------------------|
| Dendritic Cells Enhance Polyfunctionality of Adoptively Transferred T Cells That Target Cytomegalovirus in Glioblastoma.                                              | Reap EA et al.        | Cancer Res.    | 29093005 | 2018 | A randomised trial was conducted in which some patients received CMV pp65-specific T cells with CMV-DC vaccination (CMV-ATCT-DC) and were compared to patients who had received saline (CMV-ATCT-saline). Patients who received CMV-ATCT-DC vaccination experienced a significant increase in the overall frequencies of IFN $\gamma$ +, TNF $\alpha$ +, and CCL3+ polyfunctional, CMV-specific CD8+ T cells which translated to longer overall survival |
| Co-delivery of tumor-derived exosomes with $\alpha$ -galactosylceramide on dendritic cell-based immunotherapy for glioblastoma.                                       | Liu H et al.          | Cancer Lett.   | 28947140 | 2017 | Tumor-associated antigen specific Dendritic cells with an invariant natural killer T cell adjuvant was used in orthotopic rats with GBM who were vaccinated with tumour-derived exosomes and $\alpha$ -galactosylceramide -pulsed dendritic cells. This produced robust activation and proliferation of tumour-specific cytotoxic T lymphocytes.                                                                                                         |
| Rindopepimut with temozolomide for patients with newly diagnosed, EGFRvIII-expressing glioblastoma (ACT IV): a randomised, double-blind, international phase 3 trial. | Weller M et al.       | Lancet Oncol.  | 28844499 | 2017 | Rindopepimut is a vaccine targeting the EGFR deletion mutation EGFRvIII which the authors used in a randomised, double-blind, international phase 3 trial to explore if the addition of rindopepimut to chemotherapy is able to improve survival in patients with EGFRvIII-positive glioblastoma. They found it did not increase survival in newly diagnosed GBM.                                                                                        |
| A phase II trial of autologous dendritic cell vaccination and radiochemotherapy following fluorescence-guided surgery in newly diagnosed glioblastoma patients.       | Inogés S et al.       | J Transl Med.  | 28499389 | 2017 | Phase-II clinical trial autologous dendritic cell vaccination in patients with newly diagnosed patients GBM and found it was a safe and effective treatment. Overall survival was better in patients with methylated MGMT promoter.                                                                                                                                                                                                                      |
| Exosomes isolated from plasma of glioma patients enrolled in a vaccination trial reflect antitumor immune activity and might predict survival                         | Laurent Muller et al. | Oncoimmunology | 26155415 | 2015 | Protein and mRNA expression levels for immune-related genes in plasma exosomes were useful in evaluating glioma patients' response to vaccination therapy.                                                                                                                                                                                                                                                                                               |

|                                                                                                                                                                                                                                  |                          |                                  |            |      |                                                                                                                                                                                                                                                                                                                                                                                                                                                                                                                                                                                                                                      |
|----------------------------------------------------------------------------------------------------------------------------------------------------------------------------------------------------------------------------------|--------------------------|----------------------------------|------------|------|--------------------------------------------------------------------------------------------------------------------------------------------------------------------------------------------------------------------------------------------------------------------------------------------------------------------------------------------------------------------------------------------------------------------------------------------------------------------------------------------------------------------------------------------------------------------------------------------------------------------------------------|
| Dendritic cell immuno-therapy for brain tumors                                                                                                                                                                                   | Joseph P et al.          | Journal of Neuro-Oncology        | 26037466   | 2015 | DC vaccines have shown efficacy in multiple pre-clinical studies and Phase I/II clinical trials for gliomas. While acid-eluted peptide and glioma-associated peptide preparations have shown some clinical benefit                                                                                                                                                                                                                                                                                                                                                                                                                   |
| Effective Treatment of Established GL261 Murine Gliomas through Picornavirus Vaccination-Enhanced Tumor Antigen-Specific CD8+ T Cell Responses                                                                                   | Danielle N Renner et al. | PLOS one                         | 25933216   | 2015 | GL261-Quad gliomas elicit MHC class I restricted CD8+ T cell responses against tumor-specific antigen. Vaccination with an engineered picornavirus significantly increases levels of tumor antigen-specific CD8+ T cells infiltrating the CNS. Enhanced CD8+ T cell responses toward GL261-Quad gliomas are accompanied by delayed tumor outgrowth and prolonged survival. Functional cytotoxic activity of CD8+ T cells is required for picornavirus vaccination efficacy against GL261-Quad gliomas                                                                                                                                |
| First clinical results of a personalized immuno-therapeutic vaccine against recurrent, incompletely resected, treatment-resistant glioblastoma multiforme (GBM) tumors, based on combined allo- and auto-immune tumor reactivity | Virgil E.J et al.        | Vaccine                          | 25865468   | 2015 | Gliovac (or ERC 1671) composed of autologous antigens, derived from the patient's surgically removed tumor tissue, administered together with allogeneic antigens from glioma tissue resected from other GBM patients. Gliovac administration in patients that have failed standard of care therapies showed minimal toxicity and enhanced overall survival. Six-month (26 weeks) survival for the nine Gliovac patients was 100% versus 33% in control group. At week 40, the published overall survival was 10% if recurrent, reoperated patients were not treated. In the Gliovac treated group, the survival at 40 weeks was 77% |
| Use of ERC-1671 Vaccine in a Patient with Recurrent Glioblastoma Multiforme after Progression during Bevacizumab Therapy: First Published Report                                                                                 | Daniela A Bota et al.    | The permanente journal           | PMC4403580 | 2015 | Patients survived for ten months after the vaccine administration without any other adjuvant therapy and died of complications related to his previous chemotherapies. The tissues collected after two vaccination cycles and at the time of death showed a robust immune response and no viable tumor. Preliminary data strongly indicate that ERC-1671 could be effective in the treatment of progressive malignant gliomas                                                                                                                                                                                                        |
| Wilms tumor 1 peptide vaccination combined with temozolomide against newly diagnosed glioblastoma: safety and                                                                                                                    | Naoya Hashimoto et al.   | Cancer Immunology, Immunotherapy | 25772149   | 2015 | Wilms tumor 1 peptide vaccination.1 week after the end of combined concurrent radio/temozolomide therapy, and administration was continued once per week for 7 weeks.A progression-free survival from histological diagnosis of 5.2–49.1 months                                                                                                                                                                                                                                                                                                                                                                                      |

|                                                                                                                                          |                              |                                  |            |      |                                                                                                                                                                                                                                                                                                                                                                                                                                                                                                                             |
|------------------------------------------------------------------------------------------------------------------------------------------|------------------------------|----------------------------------|------------|------|-----------------------------------------------------------------------------------------------------------------------------------------------------------------------------------------------------------------------------------------------------------------------------------------------------------------------------------------------------------------------------------------------------------------------------------------------------------------------------------------------------------------------------|
| impact on immunological response                                                                                                         |                              |                                  |            |      |                                                                                                                                                                                                                                                                                                                                                                                                                                                                                                                             |
| Tetanus toxoid and CCL3 improve dendritic cell vaccines in mice and glioblastoma patients                                                | Duane Aet al.                | Nature                           | PMC4510871 | 2015 | Modulation of CMV-specific DCs with Td pre-conditioning increases their migratory capacity and may improve clinical outcomes in patients with GBM. Corroborating studies in mice support these claims and underline CCL3 as a novel and important mediator of increased DC migration to VDLNs guiding naive CD81 localization to sites of DC-CD41 interactions in lymph nodes.                                                                                                                                              |
| OX40 ligand expressed in glioblastoma modulates adaptive immunity depending on the microenvironment: a clue for successful immunotherapy | Ichiyo Shibahara et al.      | Molecular Cancer                 | PMC4339477 | 2015 | OX40L mRNA was expressed in glioblastoma specimens and higher levels were associated with prolonged progression-free survival of patients with glioblastoma, who had undergone gross total resection. OX40 agonist antibody together with glioma cell lysates elicited stronger antitumor immunity and prolonged the survival of mice bearing glioma or glioma-initiating cell-like cells. OX40 triggering activated regulatory T cells cultured under hypoxia led to the induction of the immunosuppressive cytokine IL10. |
| A phase II, multicenter trial of rindopepimut (CDX-110) in newly diagnosed glioblastoma: the ACT III study                               | James Schuster et al,        | Oxford Academic Neuro-oncology   | 25586468   | 2015 | Progression-free survival at 5.5 months (~8.5 mo from diagnosis) was 66%. Median overall survival was 21.8 months, and 36-month overall survival was 26%. Extended rindopepimut vaccination (up to 3.5+ years) was well tolerated. Anti-EGFRvIII antibody titers increased ≥4-fold in 85% of patients and increased with duration of treatment. EGFRvIII was eliminated in 4/6 (67%) tumor samples obtained after >3 months of therapy.                                                                                     |
| Enhancement of glioma-specific immunity in mice by “NOBEL”, an insulin-like growth factor 1 receptor antisense oligodeoxynucleotide      | Mélanie Morin-Brureau et al. | Cancer Immunology, Immunotherapy | 25579379   | 2015 | In vitro treatment of GL261 with NOBEL IGF-1R/ AS-ODN inhibits IGF-1R expression with minimal Cytotoxicity. NOBEL is immunostimulatory but only effective in preventing tumor development when co administered with GL261 cell                                                                                                                                                                                                                                                                                              |
| Human CD14+ cells loaded with Paclitaxel inhibit in vitro cell proliferation of glioblastoma                                             | Arianna Bonomi et al.        | Cytototherapy                    | 25457277   | 2015 | Both CD14+ and DCs were able to incorporate PTX and release the drug in the CM in a time-dependent manner (maximal release over 24 h). The addition of CM from CD14+ and DCs loaded with PTX strongly inhibits proliferation of U87 MG cells.                                                                                                                                                                                                                                                                               |

|                                                                                                                                                  |                         |                                  |          |      |                                                                                                                                                                                                                                                                                                                                                                                                                                                                                                                         |
|--------------------------------------------------------------------------------------------------------------------------------------------------|-------------------------|----------------------------------|----------|------|-------------------------------------------------------------------------------------------------------------------------------------------------------------------------------------------------------------------------------------------------------------------------------------------------------------------------------------------------------------------------------------------------------------------------------------------------------------------------------------------------------------------------|
|                                                                                                                                                  |                         |                                  |          |      | Peripheral blood-derived CD14+ and DCs, in addition to their application for immunotherapy for GB, could also be used to delivery anti-cancer drugs, such as PTX, to kill GB cells.                                                                                                                                                                                                                                                                                                                                     |
| Glioblastoma exosomes and IGF-1R/AS-ODN are immunogenic stimuli in a translational research immunotherapy paradigm                               | Larry A Harshyne et al. | Cancer Immunology, Immunotherapy | 25391690 | 2015 | Vaccine consisting of Lucite diffusion chambers containing irradiated autologous tumor cells pre-treated with an antisense oligodeoxynucleotide (AS-ODN) directed against the insulin-like growth factor type 1 receptor was found to elicit positive clinical responses in 8/12 patients when implanted in the rectus sheath for 24 h<br>Release of AS-ODN together with selective release of exosomes from glioblastoma cells implanted in chambers may drive the therapeutic effect seen in the pilot vaccine trial. |
| Dendritic cell vaccination combined with temozolomide retreatment: results of a phase I trial in patients with recurrent glioblastoma multiforme | Martin K Hunn et al.    | Journal of Neuro-oncology        | 25366363 | 2015 | GBM patients relapsing after TMZ with a combination of surgery, autologous DC-based vaccines<br>and further TMZ is safe but is hampered by uncertainty in achieving the required vaccine yield.                                                                                                                                                                                                                                                                                                                         |
| Phase I/IIa trial of fractionated radiotherapy, temozolomide, and autologous formalin-fixed tumor vaccine for newly diagnosed glioblastoma       | Eiichi Ishikawa et al., | Journal of Neurosurgery          | 24995786 | 2015 | This treatment regimen was well tolerated by all patients.<br>The percentage of patients with progression-free survival (PFS) $\geq$ 24 months was 33%.<br>The median PFS, median overall survival (OS), and the actuarial 2- and 3-year survival rates of the 24 patients were 8.2 months, 22.2 months, 47%, and 38%,                                                                                                                                                                                                  |
| Immunomodulation Mediated by Anti-angiogenic Therapy Improves CD8 T Cell Immunity Against Experimental Glioma                                    | Malo CS et al.          | Frontiers in Oncology            | 30211113 | 2018 | VEGF-Trap treatment has anti-angiogenic effect, normalizing the vasculature and enhance tumor antigen-specific CD8T cell response.                                                                                                                                                                                                                                                                                                                                                                                      |
| Molecular subgroups and B7-H4 expression levels predict responses to dendritic cell vaccines in glioblastoma: an exploratory                     | Yao Y et al.al          | Cancer Immunol Immunother.       | 30159779 | 2018 | DC based vaccination increases overall survival and progression-free survival in glioblastoma patients, and also increases plasma levels of cytokines CCL22 and IFN- $\gamma$ compared with placebo.                                                                                                                                                                                                                                                                                                                    |

|                                                                                                                                                                                                         |                     |                   |          |      |                                                                                                                                                                                                                                                                                                                                                                                                                   |
|---------------------------------------------------------------------------------------------------------------------------------------------------------------------------------------------------------|---------------------|-------------------|----------|------|-------------------------------------------------------------------------------------------------------------------------------------------------------------------------------------------------------------------------------------------------------------------------------------------------------------------------------------------------------------------------------------------------------------------|
| randomized phase II clinical trial.                                                                                                                                                                     |                     |                   |          |      |                                                                                                                                                                                                                                                                                                                                                                                                                   |
| Phase II study of ERC1671 plus bevacizumab versus bevacizumab plus placebo in recurrent glioblastoma: interim results and correlations with CD4+ T-lymphocyte counts.                                   | Bota DA et al.      | CNS Oncol         | 30157683 | 2018 | The combination of the novel immunotherapy ERC1671 and bevacizumab had good overall survival rates                                                                                                                                                                                                                                                                                                                |
| Therapeutic Immunization against Glioblastoma.                                                                                                                                                          | Schijns VEJC et al. | Int J Mol Sci.    | 30150597 | 2018 | GLIOVAC/ERC1671 therapy in individual late-stage relapsing patients had significantly increase of overall survival rates of 6 months, with no severe adverse effects.                                                                                                                                                                                                                                             |
| A Dendritic Cell-Targeted Adenoviral Vector Facilitates Adaptive Immune Response Against Human Glioma Antigen (CMV-IE) and Prolongs Survival in a Human Glioma Tumor Model.                             | Kim JW et al.       | Neurotherapeutics | 30027430 | 2018 | A novel adenovirus (Ad5scFvDEC205FF) is used as a viral vector that specifically infects dendritic cells and can be delivered systemically, activating effector T cells and leading to a robust and long-lasting immune response against the tumor. It's a combination between virotherapy and immunotherapy                                                                                                      |
| Dendritic cells cross-talk with tumour antigen-specific CD8+ T cells, V $\gamma$ 9 $\gamma$ $\delta$ T cells and V $\alpha$ 24NKT cells in patients with glioblastoma multiforme and in healthy donors. | Eiraku Y et al.     | Clin Exp Immunol. | 30009488 | 2018 | Adjuvant effect of a combination of Z and G, resulting in the expansions of V $\gamma$ 9 $\gamma$ $\delta$ T and V $\alpha$ 24NKT cells upon induction of antigen-specific CD8+ T cells using IFN DCs/P+Z+G. This indicates that heterogeneous activation of lymphocytes shapes the responses to vaccination. These findings can help designing dendritic cell therapies combined with immuncheckpoint blockades. |

|                                                                                                                                                                                           |                     |                 |          |      |                                                                                                                                                                                                                                                                                                                                 |
|-------------------------------------------------------------------------------------------------------------------------------------------------------------------------------------------|---------------------|-----------------|----------|------|---------------------------------------------------------------------------------------------------------------------------------------------------------------------------------------------------------------------------------------------------------------------------------------------------------------------------------|
| Predictors of Response to Autologous Dendritic Cell Therapy in Glioblastoma Multiforme.                                                                                                   | Jan CI et al.       | Front Immunol   | 29910795 | 2018 | In patients receiving postsurgical adjuvant immunotherapy with autologous dendritic cell/tumor antigen vaccine (ADCTA) in conjunction with conventional treatment of concomitant chemoradiotherapy (CCRT) with temozolomide, a lower PD-1+/CD8+ ratio is correlated with better overall survival and progression-free survival. |
| First results on survival from a large Phase 3 clinical trial of an autologous dendritic cell vaccine in newly diagnosed glioblastoma.                                                    | Liau LM et al.      | J Transl Med    | 29843811 | 2018 | The addition of DCVax-L autologous dendritic cell vaccine to surgical resection followed by 6 weeks of daily radiotherapy with concurrent temozolomide, then monthly temozolomide, has a benign safety profile and shows increased length of survival                                                                           |
| Heat shock protein peptide complex-96 vaccination for newly diagnosed glioblastoma: a phase I, single-arm trial.                                                                          | Ji N et al.         | JCI Insight.    | 29769450 | 2018 | Single arm controlled trial using HSPPC-96 vaccination (combined with standard Stupp regimen of radiotherapy plus concomitant and adjuvant temozolomide), which stimulated tumor-specific immune response, resulting in longer overall survival and higher progression-free survival rates.                                     |
| IL-21 Increases the Reactivity of Allogeneic Human V $\gamma$ 9V $\delta$ 2 T Cells Against Primary Glioblastoma Tumors.                                                                  | Joalland N et al.   | J Immunother    | 29683891 | 2018 | Ex vivo sensitizations of V $\gamma$ 9V $\delta$ 2 T cells by IL-21 showed that through their cytolytic activity, they significantly eliminated GMB tumor cells after orthotopic administrations in vivo.                                                                                                                       |
| Survival gain in glioblastoma patients treated with dendritic cell immunotherapy is associated with increased NK but not CD8+ T cell activation in the presence of adjuvant temozolomide. | Pellegatta S et al. | Oncoimmunology. | 29632727 | 2018 | Two-stage phase II study, glioblastoma patients were treated with dendritic cell immunotherapy and radiochemotherapy with temozolomide (TMZ) followed by adjuvant TMZ. DC vaccination induced a significant, persistent activation of NK cells, whose increased response was significantly associated with prolonged survival.  |
| Dendritic Cells Enhance Polyfunctionality of Adoptively Transferred T                                                                                                                     | Reap EA et al.      | Cancer Res      | 29093005 | 2018 | CMV-ATCT-DC administered to GBM patients increased polyfunctional CMV-specific CD8+ T cells, correlating with overall survival (cannot confirm it is causally related). Polyfunctional T-cell responses as a potential biomarker for effective antitumor immunotherapy.                                                         |

|                                                                                                                                                                      |                       |                             |          |      |                                                                                                                                                                                                                                                                                                                                             |
|----------------------------------------------------------------------------------------------------------------------------------------------------------------------|-----------------------|-----------------------------|----------|------|---------------------------------------------------------------------------------------------------------------------------------------------------------------------------------------------------------------------------------------------------------------------------------------------------------------------------------------------|
| Cells That Target Cytomegalovirus in Glioblastoma.                                                                                                                   |                       |                             |          |      |                                                                                                                                                                                                                                                                                                                                             |
| Efficacy of depatuxizumab mafodotin (ABT-414) monotherapy in patients with EGFR-amplified, recurrent glioblastoma: results from a multi-center, international study. | Van den Bent M et al. | Cancer Chemother Pharmacol. | 29075855 | 2017 | Depatuxizumab mafodotin monotherapy in EGFR amplified recurrent GBM patients increased OS and PFS, with tolerable ocular related side effects.                                                                                                                                                                                              |
| Phase I study of sorafenib and tipifarnib for recurrent glioblastoma: NABTC 05-02.                                                                                   | Nghiemp hu PL et al.  | J Neurooncol                | 28988377 | 2018 | Combination of tipifarnib and sorafenib was toxic even at low doses, and even in patients with low toxicity, no further analysis was performed due to low OS and PFS.                                                                                                                                                                       |
| Large Amino Acid Transporter 1 Selective Liposomes of l-DOPA Functionalized Amphiphile for Combating Glioblastoma.                                                   | Bhunias S et al.      | Mol Pharm                   | 28958145 | 2017 | LAT1 mediated targeted chemotherapy with WP1066-loaded liposomes of Amphi-DOPA combined with in vivo DC-targeted DNA vaccination using a surviving encoded DNA vaccine enhanced overall survival in mice of >300% (compared to the untreated mice)                                                                                          |
| Co-delivery of tumor-derived exosomes with alpha-galactosylceramide on dendritic cell-based immunotherapy for glioblastoma.                                          | Liu H et al.          | Cancer Letters              | 28947140 | 2017 | Co-delivery of tumor-derived exosomes with $\alpha$ -GalCer on a DC-based vaccine showed powerful effects in glioblastoma immunotherapy. This vaccine induced strong activation and proliferation of tumor-specific cytotoxic T lymphocytes, synergistically breaking the immune tolerance and improving the immunosuppressive environment. |
| Rindopepimut with temozolomide for patients with newly diagnosed, EGFRvIII-expressing glioblastoma (ACT IV): a randomised, double-                                   | Weller M et al.       | Lancet Oncol                | 28844499 | 2017 | No significant difference in overall survival for the minimal residual disease when adding rindopepimut to standard chemotherapy with temozolomide                                                                                                                                                                                          |

|                                                                                                                                                                     |                      |                 |          |      |                                                                                                                                                                                                                                                                                                               |
|---------------------------------------------------------------------------------------------------------------------------------------------------------------------|----------------------|-----------------|----------|------|---------------------------------------------------------------------------------------------------------------------------------------------------------------------------------------------------------------------------------------------------------------------------------------------------------------|
| blind, international phase 3 trial.                                                                                                                                 |                      |                 |          |      |                                                                                                                                                                                                                                                                                                               |
| A phase II trial of autologous dendritic cell vaccination and radiochemotherapy following fluorescence-guided surgery in newly diagnosed glioblastoma patients.     | Inogés S et al.      | J Transl Med    | 28499389 | 2017 | The use of tumor lysate-pulsed autologous DCs following surgery, radiotherapy and chemotherapy is safe. Will need further trial to confirm OS and PFS rates.                                                                                                                                                  |
| Sensitization of glioblastoma tumor micro-environment to chemo- and immunotherapy by Galectin-1 intranasal knock-down strategy.                                     | Van Woensel M, et al | Sci Rep         | 28450700 | 2017 | Nose-to-brain delivery of chitosan coated lipid nanocapsules modulates GBM microenvironment by suppressing Gal-1 expression, and sensitizes it to TMZ treatment, increasing long term survival.                                                                                                               |
| Combination epidermal growth factor receptor variant III peptide-pulsed dendritic cell vaccine with miR-326 results in enhanced killing on EGFRvIII-positive cells. | Li J et al.          | Oncotarget      | 28412740 | 2017 | PEPvIII-DC-CTLs could specifically kill U87-EGFRvIII cells. miR-326 inhibited the expression and external secretion of TGF- $\beta$ 1 via the SMO/Gli2 pathway, reversing the immunosuppressive environment. Therefore DC-based vaccine combination with miR-326 can provide better outcomes of immunotherapy |
| Long-term Survival in Glioblastoma with Cytomegalovirus pp65-Targeted Vaccination.                                                                                  | Batich KA et al.     | Clin Cancer Res | 28411277 | 2017 | CMV DC vaccines combined to dose intensified TMZ, can increase pp65 immunity leading to prolonged PFS and OS. 4 of 11 patients who received at least 3 vaccinations were progression-free at 59–64 months following surgery.                                                                                  |
| Autologous Heat Shock Protein Peptide Vaccination for Newly Diagnosed Glioblastoma: Impact of Peripheral PD-L1 Expression on Response to Therapy.                   | Bloch O et al.       | Clin Cancer Res | 28193626 | 2017 | Vaccination with autologous tumor-derived heat shock protein peptide complexes in combination with standard therapy may improve survival, but warrants further studies. Also, patients with the most elevated expression of PD-L1 on circulating myeloid cells had the least response to vaccination.         |

|                                                                                                                                                                                         |                    |                           |          |      |                                                                                                                                                                                                                                                                                                                                                                                                                                                                                                                                             |
|-----------------------------------------------------------------------------------------------------------------------------------------------------------------------------------------|--------------------|---------------------------|----------|------|---------------------------------------------------------------------------------------------------------------------------------------------------------------------------------------------------------------------------------------------------------------------------------------------------------------------------------------------------------------------------------------------------------------------------------------------------------------------------------------------------------------------------------------------|
| Combating Established Mouse Glioblastoma through Nicotinylated-Liposomes-Mediated Targeted Chemotherapy in Combination with Dendritic-Cell-Based Genetic Immunization.                  | Saha S et al       | Advanced biosystems       | 32646187 | 2017 | IV administration of (WP-1066)-loaded liposomes of nicotinylated amphiphiles in combination with DC targeted immunization with tyrosinase-related protein-2 encoded DNA vaccine markedly enhances the OS of orthotopic glioblastoma-bearing mice (by >500% compared to the OS for the control group).                                                                                                                                                                                                                                       |
| Syndecan-4 as a biomarker to predict clinical outcome for glioblastoma multiforme treated with WT1 peptide vaccine.                                                                     | Takashima S et al. | Future science OA         | 28116121 | 2016 | Low expression of SDC-4 in peripheral blood mononuclear cells prior to WT1 vaccination correlated with favorable clinical effects of WT1 peptide vaccination of GBM patients and therefore was a prognostic factor for long-term survivors.                                                                                                                                                                                                                                                                                                 |
| $\alpha$ -type-1 polarized dendritic cell-based vaccination in recurrent high-grade glioma: a phase I clinical trial                                                                    | Y. Akiyama et al   | BMC Cancer                | 23270484 | 2012 | $\alpha$ -type-1 polarizing DCs on GBM patients with mainly HLA-A*2402. Nine patients with high-grade glioma (1 case of HLA-A*0201, 8 of A*2402) were enrolled into a phase I study and given HLA-A2 or A24-peptide cocktail-pulsed mature DCs, which produced a large amount of IL-12. All 76 DC injections were safely administered to patients. These results suggested that peptide cocktail- treated $\alpha$ -type-1 DC-based immunotherapy was feasible, and had potential as a therapeutic tool against HLA-A24+ high-grade glioma. |
| Integration of autologous dendritic cell-based immunotherapy in the standard of care treatment for patients with newly diagnosed glioblastoma: results of the HGG-2006 phase I/II trial | H. Ardon et al     | Cancer Immunol Immunother | 22527250 | 2012 | Full integration of autologous DC-based tumor vaccination into standard postoperative radiochemotherapy for newly diagnosed glioblastoma seems safe and possibly beneficial. These results were used to power the currently running phase IIb randomized clinical trial.                                                                                                                                                                                                                                                                    |

|                                                                                                             |                        |                               |          |      |                                                                                                                                                                                                                                                                                                                                                                                                                                                                                                                                                                                                                                                                                                                                       |
|-------------------------------------------------------------------------------------------------------------|------------------------|-------------------------------|----------|------|---------------------------------------------------------------------------------------------------------------------------------------------------------------------------------------------------------------------------------------------------------------------------------------------------------------------------------------------------------------------------------------------------------------------------------------------------------------------------------------------------------------------------------------------------------------------------------------------------------------------------------------------------------------------------------------------------------------------------------------|
| Heat-shock protein peptide complex- 96 vaccination for recurrent glioblastoma: a phase II, single-arm trial | O.Bloch et al          | Neuro-Oncology                | 24335700 | 2013 | The HSPPC-96 vaccine is safe and warrants further study of efficacy for the treatment of recurrent GBM. Significant pretreatment lymphopenia may impact outcomes of immunotherapy and deserves additional investigation.                                                                                                                                                                                                                                                                                                                                                                                                                                                                                                              |
| Targeting EGF receptor variant III: tumor-specific peptide vaccination for malignant gliomas                | C.A. Del Vecchio et al | Expert Reviews                | 22309662 | 2012 | EGFRvIII has been identified as a tumor-specific oncoprotein expressed in a high percentage of GBM. Owing to the unique junction produced at the exon 1 to exon 8 boundary, this EGF receptor variant can be selectively targeted without affecting expression or function of the wild-type EGF receptor. Peptide vaccination using CDX-110, a 14-mer peptide against the junction, is currently being evaluated in Phase II/III clinical trials. Preclinical and clinical data demonstrate that CDX-110 is both safe and effective in evoking humoral and cellular immunity, and is correlated with apparent increases in median time to tumor progression and overall survival compared with historical controls as reviewed above. |
| Exploiting the glioblastoma peptidome to discover novel tumour-associated antigens for immunotherapy        | V. Dutoit et al        | Brain: a journal of neurology | 22418738 | 2012 | 9 of the 10 peptides identified in GBM (one was omitted due to poor solubility) are now being developed in a multi-peptide therapeutic vaccine designated IMA950. Recently, two phase I studies in first-line patients with GBM have started in the UK and USA (clinicaltrials.gov identifier codes NCT01403285 and NCT01222221). Immunogenicity of the vaccine can be assessed and set the base to improve immunization strategies by combining multi-peptide vaccines with the most efficient immunomodulator.                                                                                                                                                                                                                      |
| Immunotherapy of rat glioma without accumulation of CD4+CD25+FOXP3+ regulatory T cells                      | E.Feng et al           | Neural Regeneration research  | 25657686 | 2017 | Co-immunotherapy, which may be due, in part, to inhibition of the accumulation of CD4+CD25+FOXP3+ Tregs. Unique method of using immunotherapy to treat glioma and has significant clinical potential. Several obstacles however need to be addressed before this therapy can be applied to humans with gliomas.                                                                                                                                                                                                                                                                                                                                                                                                                       |
| Rindopepimut: anti-EGFRvIII peptide vaccine, oncolytic                                                      | P.C. Gedeon et al      | Drugs Future                  | 25663738 | 2015 | Rindopepimut is a promising new therapeutic agent for the treatment of EGFRvIII-expressing gliomas. Vaccinating patients with EGFRvIII-positive GBM is safe, well tolerated and produces immunity against EGFRvIII-expressing cells. More specifically, peripheral administration of rindopepimut/ GM-CSF results in the production of EGFRvIII-specific humoral and DTH responses. In patients with GBM, vaccination leads to the elimination of EGFRvIII-positive GBM cells without any associated autoimmunity. The ongoing phase III clinical trial (ACT IV) is necessary to continue to assess the safety and efficacy of rindopepimut/GM-CSF therapy for newly diagnosed GBM. There is a                                        |

|                                                                                                                                                |                        |                                   |          |      |                                                                                                                                                                                                                                                                                                                                                                                                                                                                                                                                                                                                                                                                                                                                                                                                                                                                                                                                                |
|------------------------------------------------------------------------------------------------------------------------------------------------|------------------------|-----------------------------------|----------|------|------------------------------------------------------------------------------------------------------------------------------------------------------------------------------------------------------------------------------------------------------------------------------------------------------------------------------------------------------------------------------------------------------------------------------------------------------------------------------------------------------------------------------------------------------------------------------------------------------------------------------------------------------------------------------------------------------------------------------------------------------------------------------------------------------------------------------------------------------------------------------------------------------------------------------------------------|
|                                                                                                                                                |                        |                                   |          |      | strong likelihood that rindopepimut vaccination for patients with EGFRvIII-positive newly diagnosed GBM will show sufficient safety and efficacy in the phase III randomized trial leading to approval by U.S. and European regulatory agencies.                                                                                                                                                                                                                                                                                                                                                                                                                                                                                                                                                                                                                                                                                               |
| Vaccination with Irradiated Tumor Cells Pulsed with an Adjuvant That Stimulates NKT Cells Is an Effective Treatment for Glioma                 | M.K. Hunn et al        | Clinical Cancer Research          | 23147997 | 2012 | Injection of irradiated tumor cells loaded with a-GalCer is a simple procedure that could provide effective immunotherapy for patients with high-grade glioma. -GalCer has been shown to have significant antitumor effects when injected intravenously as a sole agent. It has been found that the iNKT/DC axis has some deficiencies in patients. A mild impairment of iNKT cell expansion might be explained by corticosteroid treatment. We also observed reduced numbers of circulating myeloid dendritic cells but circulating CD14 <sup>+</sup> monocytes, known to be capable of differentiating into mature dendritic cells, were present in normal quantities and expressed normal levels of CD1d. Taken together, these data suggest there are no major defects in the iNKT/DC axis in patients with high-grade glioma and that a-GalCer-pulsed irradiated autologous glioma cells could be an effective vaccine in human patients. |
| Therapeutic vaccination against autologous cancer stem cells with mRNA-transfected dendritic cells in patients with glioblastoma               | E. Osland Vik-Mo et al | Cancer Immunol Immunother         | 23817721 | 2013 | mRNA transfected DC vaccine induced a glioma stem cell (GSC) -specific immune response without eliciting serious adverse reactions.. The use of sphere-forming capability for the propagation and enrichment of CSCs is well-established in the glioblastoma. The technology for enriching such cells is transferable to a variety of tumors; therefore, the immunotherapy protocol presented here may be used as a model for targeting CSCs in other solid tumors.                                                                                                                                                                                                                                                                                                                                                                                                                                                                            |
| Identification of Novel Human Leukocyte Antigen-A*0201-Restricted, Cytotoxic T Lymphocyte Epitopes on CD133 for Cancer Stem Cell Immunotherapy | J. Ji et al            | Stem Cells Translational Medicine | 24375541 | 2013 | HLA-A*0201-restricted CD133 epitopes, CD133- 405 and CD133-753 identified. Unlike other potential CD133 epitopes examined, these two epitopes were strongly immunogenic in PBMCs from healthy donors and also naturally presented by GBM CSCs lines. Furthermore, studies in HLA-A*0201 expressing mice showed that these epitopes are indeed immunogenic in vivo but do not lead to autoimmune responses. Taken together, these results support CD133 as a suitable CTL target for GBM CSC immunotherapy. Based on these findings, a phase I trial of a dendritic cell vaccine using these CTL epitopes in recurrent glioblastoma has been initiated.                                                                                                                                                                                                                                                                                         |

|                                                                                                                 |                        |                           |          |      |                                                                                                                                                                                                                                                                                                                                                                                                  |
|-----------------------------------------------------------------------------------------------------------------|------------------------|---------------------------|----------|------|--------------------------------------------------------------------------------------------------------------------------------------------------------------------------------------------------------------------------------------------------------------------------------------------------------------------------------------------------------------------------------------------------|
| Intrinsically de-sialylated CD103+ CD8 T cells mediate beneficial anti-glioma immune responses                  | E. Jouanneau et al     | Cancer Immunol Immunother | 24893855 | 2014 | De-sialylation of CD8 is required for hyper-responsiveness and beneficial anti-glioma activity by CD8 T cells. Because CD8 de-sialylation can be induced with exogenous enzymes (and appears particularly scarce on human t cells), it represents a promising target for clinical glioma vaccine improvement.                                                                                    |
| CD137 stimulation and p38 MAPK inhibition improve reactivity in an in vitro model of glioblastoma immunotherapy | C.Kuhnol , M et al     | Cancer Immunol Immunother | 24129764 | 2013 | Study suggests p38 MaPK inhibition and anti-CD137 antibodies can enhance the immune response against GBM cells.                                                                                                                                                                                                                                                                                  |
| Varicella Zoster Virus Infection of Malignant Glioma Cell Cultures: A New Candidate for Oncolytic Virotherapy?  | H. Leske et al         | Anti-cancer Research      | 22493342 | 2012 | Varicella zoster virus (VZV) exhibits an intrinsic oncolytic potential in malignant glioma cell cultures and might be a novel candidate for virotherapy in GBM.                                                                                                                                                                                                                                  |
| Mouse glioma immunotherapy mediated by A2B5+ GL261 cell lysate-pulsed dendritic cells                           | M. Xu et al            | Journal of Neurooncology  | 24398615 | 2014 | Vaccination with A2B5+ GL261 cell lysate-pulsed DCs only has some glioma preventive effect. In order to obtain therapeutic effect, DC vaccination requires reduction of tumor load ( tumor resection) as much as possible and elimination of glioma-induced immune suppression. Increased effectiveness of DC is noted by also inhibiting transforming growth factor-beta or depletion of Tregs. |
| Phase I trial of a multi-epitope-pulsed dendritic cell vaccine for patients with newly diagnosed glioblastoma   | S. Phuphanich et al    | Cancer Immunol Immunother | 22847020 | 2012 | Phase I study of ICT-107 demonstrated the feasibility, safety, and bioactivity of a TAA-pulsed DC vaccine GBM patients. Expression of AIM2 and MAGE1 antigens in the pre-vaccine tumors correlated with prolonged survival as measured by PFS and OS in ND-GBM patients, while expression of HER2 and gp100 showed a trend toward longer PFS and OS.                                             |
| Human umbilical vein endothelial cell vaccine therapy in patients with recurrent glioblastoma                   | M. Tanaka et al        | Cancer Science            | 23106822 | 2012 | HUVEC vaccine therapy is a promising new treatment modality, without important adverse effects. Acquisition of resistance to multi-target immunotherapy, namely the HUVEC vaccine therapy, seems to be less frequent. As a matter of course, a large-scale prospective study will help confirm our present results.                                                                              |
| Live attenuated measles virus vaccine therapy for locally established malignant glioblastoma tumor cells        | A.M. Al-Shammari et al | Oncolytic Virotherapy     | n/a      | 2014 | Measles virus (MV) vaccine strains replicate efficiently in GBM tumor cells as well as in Vero and RD cells and can be further investigated for future use as GBM recommended therapy.                                                                                                                                                                                                           |

|                                                                                                       |                    |                 |          |      |                                                                                                                                                                                                                                                                                                                                                                                                  |
|-------------------------------------------------------------------------------------------------------|--------------------|-----------------|----------|------|--------------------------------------------------------------------------------------------------------------------------------------------------------------------------------------------------------------------------------------------------------------------------------------------------------------------------------------------------------------------------------------------------|
| Autologous T-cell Therapy for Cytomegalovirus as a Consolidative Treatment for Recurrent Glioblastoma | A. Shuessler et al | Cancer Research | 24795429 | 2014 | Adoptive immunotherapy of patients with recurrent GBM with CMV-specific T cells is safe and may provide long-term clinical benefits. Adoptive T-cell immunotherapy may be used both therapeutic and prophylactic settings. CMV-specific T-cell-based immunotherapy should be considered as a consolidative treatment following primary diagnosis of GBM for the prevention of recurrent disease. |
|-------------------------------------------------------------------------------------------------------|--------------------|-----------------|----------|------|--------------------------------------------------------------------------------------------------------------------------------------------------------------------------------------------------------------------------------------------------------------------------------------------------------------------------------------------------------------------------------------------------|
